# Supplementary material for: Sustainability of knowledge translation interventions in healthcare decision-making: a scoping review
Source: PubMed Central journal article supplement (PMC4839064; doi:10.1186/s13012-016-0421-7), 2016-04-21
Supplement: 13012_2016_421_MOESM1_ESM.pdf [file 13012_2016_421_MOESM1_ESM.pdf]

## Appendix 1. KT Sustainability Chronic Conditions of Interest

|                                       |
|---------------------------------------|
| Aneurysm                              |
| Angina                                |
| Arrhythmia                            |
| Arthritis                             |
| Asthma                                |
| Atherosclerosis                       |
| Atrial/ventricular fibrillation       |
| Cancer                                |
| Cardiomegaly                          |
| Cardiomyopathy                        |
| Cardiovascular diseases               |
| Cerebrovascular disorders             |
| Chronic obstructive pulmonary disease |
| Crohn's disease                       |
| Diabetes                              |
| Embolism                              |
| Heart failure                         |
| Hypertension                          |
| Inflammatory bowel disease            |
| Irritable bowel disease               |
| Ischemia                              |
| Myocardial infarction                 |
| Osteoporosis                          |
| Peripheral vascular diseases          |
| Stroke                                |
| Thrombophlebitis                      |
| Thrombosis                            |
| Ulcerative colitis                    |
