# Supplementary material for: Sustainability of knowledge translation interventions in healthcare decision-making: a scoping review
Source: PubMed Central journal article supplement (PMC4839064; doi:10.1186/s13012-016-0421-7), 2016-04-21
Supplement: 13012_2016_421_MOESM3_ESM.pdf [file 13012_2016_421_MOESM3_ESM.pdf]

### Appendix 3. Included Studies

|     | Year                                     | Reference                                                                                                                                                                                                                                                                                                                                                        |
|-----|------------------------------------------|------------------------------------------------------------------------------------------------------------------------------------------------------------------------------------------------------------------------------------------------------------------------------------------------------------------------------------------------------------------|
| 1.  | 2012                                     | Belardinelli R, Georgiou D, Cianci G, Purcaro A. 10-year exercise training in chronic heart failure: a randomized controlled trial. <i>Journal of the American college of cardiology</i> . 2012; 60(16):1521-1528.                                                                                                                                               |
| 2.  | 2012                                     | Cheng S-H, Lee T-T, Chen C-C. A longitudinal examination of a pay-for-performance program for diabetes care: evidence from a natural experiment. <i>Medical care</i> . 2012; 50(2):109-116.                                                                                                                                                                      |
| 3.  | 2012<br>(CR: Martin, 2011)               | Rothschild SK, Martin MA, Swider SM, Lynas CT, Avery EF, Janssen I <i>et al</i> . The Mexican-American Trial of Community Health workers (MATCH): design and baseline characteristics of a randomized controlled trial testing a culturally tailored community diabetes self-management intervention. <i>Contemporary clinical trials</i> . 2012; 33(2):369-377. |
| 4.  | 2012                                     | Tamone C, Fonte G, Panico A, Molinatti PA, D'Amelio P, Isaia GC. Impact of a phone follow-up program on persistence with teriparatide or PTH (1–84) treatment. <i>Calcified tissue international</i> . 2012; 90(4):272-278.                                                                                                                                      |
| 5.  | 2012                                     | Toobert DJ, Glasgow RE, Strycker LA, Barrera Jr M, King DK. Adapting and RE-AIMing a heart disease prevention program for older women with diabetes. <i>Translational behavioral medicine</i> . 2012;2(2):180-7.                                                                                                                                                 |
| 6.  | 2011                                     | Baker LC, Johnson SJ, Macaulay D, Birnbaum H. Integrated telehealth and care management program for Medicare beneficiaries with chronic disease linked to savings. <i>Health Affairs</i> . 2011; 30(9):1689-1697.                                                                                                                                                |
| 7.  | 2011<br>(CR: Toobert, 2012)              | Barrera M, Toobert DJ, Strycker LA, Osuna D, King DK, Glasgow RE. Multiple-behavior–change interventions for women with Type 2 diabetes. <i>Diabetes Spectrum</i> . 2011; 24(2):75-80.                                                                                                                                                                           |
| 8.  | 2011                                     | Gibson TB, Mahoney J, Ranghell K, Cherney BJ, McElwee N. Value-based insurance plus disease management increased medication use and produced savings. <i>Health Affairs</i> . 2011; 30(1):100-108.                                                                                                                                                               |
| 9.  | 2011<br>(CR: Kim, 2008)                  | Kim MT, Han HR, Hedlin H, Kim J, Song HJ, Kim KB <i>et al</i> . Teletransmitted monitoring of blood pressure and bilingual nurse counseling–sustained improvements in blood pressure control during 12 months in hypertensive Korean Americans. <i>The Journal of Clinical Hypertension</i> . 2011; 13(8):605-612.                                               |
| 10. | 2011                                     | Martin MA, Swider SM, Olinger T, Avery E, Lynas CM, Carlson K <i>et al</i> . Recruitment of Mexican American adults for an intensive diabetes intervention trial. <i>Ethnicity &amp; disease</i> . 2011;21(1):7-12.                                                                                                                                              |
| 11. | 2010<br>(CR: Gilmore, 2007; Chung, 2003) | Chen JY, Kang N, Juarez DT, Hodges KA, Chung RS, Legorreta AP. Impact of a pay-for-performance program on low performing physicians. <i>J Healthc Qual</i> . 2010; 32(1):13-21; quiz 21-12.                                                                                                                                                                      |
| 12. | 2010                                     | Desouza CV, Rentschler L, Haynatzki G. The effect of group clinics in the control of diabetes. <i>Primary care diabetes</i> . 2010; 4(4):251-254.                                                                                                                                                                                                                |
| 13. | 2010                                     | Hughes SL, Seymour RB, Campbell RT, Desai P, Huber G, Chang HJ. Fit and Strong!: bolstering maintenance of physical activity among older adults with lower-extremity osteoarthritis. <i>American journal of health behavior</i> . 2010; 34(6):750.                                                                                                               |
| 14. | 2010                                     | Huizinga M, Gebretsadik T, Ulen CG, Shintani A, Michon S, Shackleford L <i>et al</i> . Preventing glycaemic relapse in recently controlled type 2 diabetes patients: a randomised controlled trial. <i>Diabetologia</i> . 2010; 53(5):832-839.                                                                                                                   |
| 15. | 2010                                     | Wisse W, Rookhuizen MB, de Kruif MD, van Rossum J, Jordans I, ten Cate H <i>et al</i> . Prescription of physical activity is not sufficient to change sedentary behavior and improve glycemic control in type 2 diabetes patients. <i>Diabetes research and clinical practice</i> . 2010; 88(2):e10-e13.                                                         |
| 16. | 2010                                     | Xian Y, Pan W, Peterson ED, Heidenreich PA, Cannon CP, Hernandez AF <i>et al</i> . Are quality improvements associated with the Get With the Guidelines-Coronary Artery Disease (GWTG-CAD) program sustained over time?: A longitudinal comparison of GWTG-CAD hospitals versus non-GWTG-CAD hospitals. <i>American heart journal</i> . 2010; 159(2):207-214.    |
| 17. | 2009                                     | Chavannes NH, Grijzen M, van den Akker M, Schepers H, Nijdam M, Tiep B <i>et al</i> . Integrated disease                                                                                                                                                                                                                                                         |

|     |      |                                                                                                                                                                                                                                                                                                                                                                                  |
|-----|------|----------------------------------------------------------------------------------------------------------------------------------------------------------------------------------------------------------------------------------------------------------------------------------------------------------------------------------------------------------------------------------|
|     |      | management improves one-year quality of life in primary care COPD patients: a controlled clinical trial. <i>Primary care respiratory journal : journal of the General Practice Airways Group</i> . 2009;18(3):171-6.                                                                                                                                                             |
| 18. | 2009 | Jia H, Chuang H-C, Wu SS, Wang X, Chumbler NR. Long-term effect of home telehealth services on preventable hospitalization use. <i>J Rehabil Res Dev</i> . 2009; 46(5):557-566.                                                                                                                                                                                                  |
| 19. | 2009 | Olson KL, Delate T, Rasmussen J, Humphries TL, Merenich JA. Outcomes of patients discharged from pharmacy-managed cardiovascular disease management. <i>The American journal of managed care</i> . 2009; 15(8):497-503.                                                                                                                                                          |
| 20. | 2009 | Radziewicz RM, Rose JH, Bowman KF, Berila RA, O'Toole EE, Given B. Establishing treatment fidelity in a coping and communication support telephone intervention for aging patients with advanced cancer and their family caregivers. <i>Cancer nursing</i> . 2009; 32(3):193-202.                                                                                                |
| 21. | 2009 | Svetkey LP, Pollak KI, Yancy WS, Dolor RJ, Batch BC, Samsa G <i>et al</i> . Hypertension Improvement Project Randomized Trial of quality improvement for physicians and lifestyle modification for patients. <i>Hypertension</i> . 2009; 54(6):1226-1233.                                                                                                                        |
| 22. | 2009 | van Wetering CR, Hoogendoorn M, Mol S, Rutten-van Mólken M, Schols A. Short-and long-term efficacy of a community-based COPD management programme in less advanced COPD: a randomised controlled trial. <i>Thorax</i> . 2010; 65(1):7-13.                                                                                                                                        |
| 23. | 2008 | Bocchi EA, Cruz F, Guimarães G, Moreira LFP, Issa VS, Ferreira SMA <i>et al</i> . Long-Term Prospective, Randomized, Controlled Study Using Repetitive Education at Six-Month Intervals and Monitoring for Adherence in Heart Failure Outpatients The REMADHE Trial. <i>Circulation: Heart Failure</i> . 2008; 1(2):115-124.                                                     |
| 24. | 2008 | Giannuzzi P, Temporelli PL, Marchioli R, Maggioni AP, Balestroni G, Ceci V <i>et al</i> . Global secondary prevention strategies to limit event recurrence after myocardial infarction: results of the GOSPEL study, a multicenter, randomized controlled trial from the Italian Cardiac Rehabilitation Network. <i>Archives of Internal Medicine</i> . 2008; 168(20):2194-2204. |
| 25. | 2008 | Kim MT, Kim EY, Han HR, Jeong S, Lee JE, Park HJ <i>et al</i> . Mail education is as effective as in-class education in hypertensive Korean patients. <i>Journal of clinical hypertension (Greenwich, Conn)</i> . 2008;10(3):176-84.                                                                                                                                             |
| 26. | 2008 | Lawrence DB, Allison W, Chen JC, Demand M. Improving medication adherence with a targeted, technology-driven disease management intervention. <i>Disease Management</i> . 2008; 11(3):141-144.                                                                                                                                                                                   |
| 27. | 2008 | Mildestvedt T, Meland E, Eide GE. How important are individual counselling, expectancy beliefs and autonomy for the maintenance of exercise after cardiac rehabilitation? <i>Scandinavian journal of public health</i> . 2008; 36(8):832-840.                                                                                                                                    |
| 28. | 2007 | Berg GD, Wadhwa S. Health services outcomes for a diabetes disease management program for the elderly. <i>Disease Management</i> . 2007; 10(4):226-234.                                                                                                                                                                                                                          |
| 29. | 2007 | Chin MH, Drum ML, Guillen M, Rimington A, Levie JR, Kirchhoff AC <i>et al</i> . Improving and sustaining diabetes care in community health centers with the health disparities collaboratives. <i>Medical care</i> . 2007; 45(12):1135-1143.                                                                                                                                     |
| 30. | 2007 | Del Sindaco D, Pulignano G, Minardi G, Apostoli A, Guerrieri L, Rotoloni M <i>et al</i> . Two-year outcome of a prospective, controlled study of a disease management programme for elderly patients with heart failure. <i>Journal of Cardiovascular Medicine</i> . 2007; 8(5):324-329.                                                                                         |
| 31. | 2007 | Dennison CR, Post WS, Kim MT, Bone LR, Cohen D, Blumenthal RS <i>et al</i> . Underserved Urban African American Men: Hypertension Trial Outcomes and Mortality During 5 Years*. <i>American journal of hypertension</i> . 2007; 20(2):164-171.                                                                                                                                   |
| 32. | 2007 | Gilmore AS, Zhao Y, Kang N, Ryskina KL, Legorreta AP, Taira DA <i>et al</i> . Patient outcomes and evidence-based medicine in a preferred provider organization setting: a six-year evaluation of a physician pay-for-performance program. <i>Health services research</i> . 2007;42(6 Pt 1):2140-59; discussion 294-323. doi:10.1111/j.1475-6773.2007.00725.x.                  |
| 33. | 2007 | Hess PL, Reingold JS, Jones J, Fellman MA, Knowles P, Ravenell JE <i>et al</i> . Barbershops as hypertension detection, referral, and follow-up centers for black men. <i>Hypertension</i> . 2007; 49(5):1040-1046.                                                                                                                                                              |
| 34. | 2007 | Jiraporn Getpreechaswas M, Boontorterm N. A model of health services for hypertension in primary care unit in Patumthani Province. <i>J Med Assoc Thai</i> . 2007; 90(1):129-136.                                                                                                                                                                                                |
| 35. | 2006 | Bailie RS, Robinson G, Kondalsamy-Chennakesavan SN, Halpin S, Wang Z. Investigating the sustainability of outcomes in a chronic disease treatment programme. <i>Social Science &amp; Medicine</i> .                                                                                                                                                                              |

|     |      |                                                                                                                                                                                                                                                                                                                                  |
|-----|------|----------------------------------------------------------------------------------------------------------------------------------------------------------------------------------------------------------------------------------------------------------------------------------------------------------------------------------|
|     |      | 2006; 63(6):1661-1670.                                                                                                                                                                                                                                                                                                           |
| 36. | 2006 | Inglis SC, Pearson S, Treen S, Gallasch T, Horowitz JD, Stewart S. Extending the horizon in chronic heart failure effects of multidisciplinary, home-based intervention relative to usual care. <i>Circulation</i> . 2006; 114(23):2466-2473.                                                                                    |
| 37. | 2005 | Maroto Montero JM, Artigao Ramirez R, Morales Duran MD, de Pablo Zarzosa C, Abraira V. [Cardiac rehabilitation in patients with myocardial infarction: a 10-year follow-up study]. <i>Rev Esp Cardiol</i> . 2005; 58(10):1181-1187.                                                                                              |
| 38. | 2005 | Phillips LS, Ziemer DC, Doyle JP, Barnes CS, Kolm P, Branch WT <i>et al</i> . An Endocrinologist-Supported Intervention Aimed at Providers Improves Diabetes Management in a Primary Care Site Improving Primary Care of African Americans with Diabetes (IPCAAD) 7. <i>Diabetes Care</i> . 2005; 28(10):2352-2360.              |
| 39. | 2004 | Bakitas M, Stevens M, Ahles T, Kirn M, Skalla K, Kane N <i>et al</i> . Project ENABLE: A palliative care demonstration project for advanced cancer patients in three settings. <i>Journal of palliative medicine</i> . 2004; 7(2):363-372.                                                                                       |
| 40. | 2004 | Fihn SD, McDonnell MB, Diehr P, Anderson SM, Bradley KA, Au DH <i>et al</i> . Effects of sustained audit/feedback on self-reported health status of primary care patients. <i>The American journal of medicine</i> . 2004; 116(4):241-248.                                                                                       |
| 41. | 2004 | Group CM-CTDS. Closing the Gap: Effect of Diabetes Case Management on Glycemic Control Among Low-Income Ethnic Minority Populations The California Medi-Cal Type 2 Diabetes Study. <i>Diabetes Care</i> . 2004; 27(1):95-103.                                                                                                    |
| 42. | 2003 | Behnke M, Jorres R, Kirsten D, Magnussen H. Clinical benefits of a combined hospital and home-based exercise programme over 18 months in patients with severe COPD. <i>Monaldi archives for chest disease</i> . 2003; 59(1):44-51.                                                                                               |
| 43. | 2003 | Chung RS, Chernicoff HO, Nakao KA, Nickel RC, Legorreta AP. A quality-driven physician compensation model: four-year follow-up study. <i>Journal for healthcare quality : official publication of the National Association for Healthcare Quality</i> . 2003;25(6):31-7.                                                         |
| 44. | 2003 | Gæde P, Vedel P, Larsen N, Jensen GV, Parving H-H, Pedersen O. Multifactorial intervention and cardiovascular disease in patients with type 2 diabetes. <i>New England Journal of Medicine</i> . 2003; 348(5):383-393.                                                                                                           |
| 45. | 2003 | Gary TL, Bone LR, Hill MN, Levine DM, McGuire M, Saudek C <i>et al</i> . Randomized controlled trial of the effects of nurse case manager and community health worker interventions on risk factors for diabetes-related complications in urban African Americans. <i>Preventive medicine</i> . 2003; 37(1):23-32.               |
| 46. | 2002 | Allen-Rameym FC, Diette GB, McDonald RC, Skinner EA, Steinwachs DM, Wu AW. Methods Aimed at Improving Asthma Care and Outcomes Management. <i>Disease Management &amp; Health Outcomes</i> . 2002; 10(8):495-503.                                                                                                                |
| 47. | 2002 | Froehlich JB, Karavite D, Russman PL, Erdem N, Wise C, Zelenock G <i>et al</i> . American College of Cardiology/American Heart Association preoperative assessment guidelines reduce resource utilization before aortic surgery. <i>Journal of vascular surgery</i> . 2002; 36(4):758-e751.                                      |
| 48. | 2001 | Baker AM, Lafata JE, Ward RE, Whitehouse F, Divine G. A Web-based diabetes care management support system. <i>Joint Commission Journal on Quality and Patient Safety</i> . 2001; 27(4):179-190.                                                                                                                                  |
| 49. | 2000 | Coleman E, Eilertsen T, Kramer A, Magid D, Beck A, Conner D. Reducing emergency visits in older adults with chronic illness. A randomized, controlled trial of group visits. <i>Effective clinical practice: ECP</i> . 2000; 4(2):49-57.                                                                                         |
| 50. | 2000 | Hedges JR, Feldman HA, Bittner V, Goldberg RJ, Zapka J, Osganian SK <i>et al</i> . Impact of Community Intervention to Reduce Patient Delay Time on Use of Reperfusion Therapy for Acute Myocardial Infarction Rapid Early Action for Coronary Treatment (REACT) Trial. <i>Academic Emergency Medicine</i> . 2000; 7(8):862-872. |
| 51. | 2000 | Rowley KG, Daniel M, Skinner K, Skinner M, White GA, O'Dea K. Effectiveness of a community-directed healthy lifestyle program in a remote Australian Aboriginal community. <i>Australian and New Zealand journal of public health</i> . 2000; 24(2):136-144.                                                                     |
| 52. | 2000 | Skinner CS, Arfken CL, Waterman B. Outcomes of the Learn, Share & Live breast cancer education program for older urban women. <i>American Journal of Public Health</i> . 2000; 90(8):1229.                                                                                                                                       |
| 53. | 2000 | Stroebel RJ, Broers JK, Houle SK, Scott CG, Naessens JM. Improving hypertension control: a team approach in a primary care setting. <i>Joint Commission Journal on Quality and Patient Safety</i> . 2000; 26(11):623-632.                                                                                                        |

|                                             |      |                                                                                                                                                                                                                                                                                                                    |
|---------------------------------------------|------|--------------------------------------------------------------------------------------------------------------------------------------------------------------------------------------------------------------------------------------------------------------------------------------------------------------------|
| 54.                                         | 1999 | Daniel M, Green LW, Marion SA, Gamble D, Herbert CP, Hertzman C <i>et al.</i> Effectiveness of community-directed diabetes prevention and control in a rural Aboriginal population in British Columbia, Canada. <i>Social science &amp; medicine.</i> 1999; 48(6):815-832.                                         |
| 55.                                         | 1999 | Grosbois J-M, Lamblin C, Lemaire B, Chekroud H, Dernis J-M, Douay B <i>et al.</i> Long-term benefits of exercise maintenance after outpatient rehabilitation program in patients with chronic obstructive pulmonary disease. <i>Journal of Cardiopulmonary Rehabilitation and Prevention.</i> 1999; 19(4):216-225. |
| 56.                                         | 1999 | Higginbotham N, Heading G, McElduff P, Dobson A, Heller R. Reducing coronary heart disease in the Australian Coalfields: evaluation of a 10-year community intervention. <i>Social science &amp; medicine.</i> 1999; 48(5):683-692.                                                                                |
| 57.                                         | 1998 | Pill R, Stott N, Rollnick S, Rees M. A randomized controlled trial of an intervention designed to improve the care given in general practice to type II diabetic patients: patient outcomes and professional ability to change behaviour. <i>Family Practice.</i> 1998; 15(3):229-235.                             |
| 58.                                         | 1997 | Corkery E, Palmer C, Foley ME, Schechter CB, Frisher L, Roman SH. Effect of a bicultural community health worker on completion of diabetes education in a Hispanic population. <i>Diabetes Care.</i> 1997; 20(3):254-257.                                                                                          |
| 59.                                         | 1996 | Kelso TM, Abou-Shala N, Heilker GM, Arheart KL, Portner TS, Self TH. Comprehensive long-term management program for asthma: effect on outcomes in adult African-Americans. <i>The American journal of the medical sciences.</i> 1996; 311(6):272-280.                                                              |
| 60.                                         | 1996 | Reichard P, Pihl M, Rosenqvist U, Sule J. Complications in IDDM are caused by elevated blood glucose level: the Stockholm Diabetes Intervention Study (SDIS) at 10-year follow up. <i>Diabetologia.</i> 1996; 39(12):1483-1488.                                                                                    |
| 61.                                         | 1991 | Erfurt JC, Foote A, Heirich MA. Worksite wellness programs: incremental comparison of screening and referral alone, health education, follow-up counseling, and plant organization. <i>American Journal of Health Promotion.</i> 1991; 5(6):438-448.                                                               |
| 62.                                         | 1988 | Perk J, Hedbäck B, Jutterdal S. Cardiac rehabilitation: evaluation of a long-term programme of physical training for out-patients. <i>Scandinavian journal of rehabilitation medicine.</i> 1988; 21(1):13-17.                                                                                                      |
| 63.                                         | 1984 | Hopper SV, Miller JP, Birge C, Swift J. A randomized study of the impact of home health aides on diabetic control and utilization patterns. <i>American journal of public health.</i> 1984; 74(6):600-602.                                                                                                         |
| 64.                                         | 1984 | Weiss LJ, Sklar BW. Project OPEN: A hospital-based long-term care demonstration program for the chronically ill elderly. <i>Home health care services quarterly.</i> 1984; 4(3-4):127-145.                                                                                                                         |
| 65.                                         | 1983 | Morisky DE, Levine DM, Green LW, Shapiro S, Russell RP, Smith CR. Five-year blood pressure control and mortality following health education for hypertensive patients. <i>American Journal of Public Health.</i> 1983; 73(2):153-162.                                                                              |
| 66.                                         | 1982 | Ambrosio G, Zamboni S, Dal Palu C. Treatment of hypertension: the community approach. <i>Postgraduate medical journal.</i> 1982; 59:131-133.                                                                                                                                                                       |
| 67.                                         | 1979 | Krishan I, Brennan Jr L, Nobrega F, Smoldt R, Smutka L, Labarthe D <i>et al.</i> The Mayo Three-Community Hypertension Control Program. II. Outcome of intervention in entire communities. In: <i>Mayo Clinic Proceedings: 1979</i> ; 1979: 299-306.                                                               |
| <b>Abbreviations: CR</b> – Companion Report |      |                                                                                                                                                                                                                                                                                                                    |
