# Supplementary material for: Sustainability of knowledge translation interventions in healthcare decision-making: a scoping review
Source: PubMed Central journal article supplement (PMC4839064; doi:10.1186/s13012-016-0421-7), 2016-04-21
Supplement: 13012_2016_421_MOESM4_ESM.pdf [file 13012_2016_421_MOESM4_ESM.pdf]

## Appendix 4. Study Characteristics

| First Author, Year                          | Country | Study Design | Funding                           | Study Period | KT Duration (Follow up)* | Site; Study setting              | Organizational Context                                   | Sample Size - Pxs overall (Drs) | No. of Arms | Defined Sustainability | Definition Cited                                                   | Sustainability Terminology [Root word] |
|---------------------------------------------|---------|--------------|-----------------------------------|--------------|--------------------------|----------------------------------|----------------------------------------------------------|---------------------------------|-------------|------------------------|--------------------------------------------------------------------|----------------------------------------|
| Belardinelli, 2012                          | Italy   | RCT          | Research funding body             | NR           | 522                      | single site; hospital, community | NR                                                       | 123                             | 2           | No                     | NA                                                                 | Long term, Sustain                     |
| Cheng, 2012                                 | Taiwan  | Cohort       | Research funding body             | 2004 to 2009 | 209                      | multi-site; clinic               | Nationwide compulsory universal health insurance program | 189020 (3582)                   | 2           | No                     | NA                                                                 | Long term, Continue                    |
| Rothschild, 2012 (CR: Martin, 2011)         | USA     | RCT          | NR                                | NR           | 104                      | single site; clinic              | University Medical Center                                | 144                             | 2           | No                     | NA                                                                 | Sustain, Adhere, Long term             |
| Tamone, 2012                                | Italy   | Cohort       | Commercial organisation           | 2008 to 2010 | 78                       | multi-site; hospital             | NR                                                       | 780                             | 2           | No                     | NA                                                                 | Persist, Long term                     |
| Baker, 2011                                 | USA     | Cohort       | Commercial organisation           | 2006 to 2008 | 104                      | multi-site; home, clinic         | 3 Medical practices                                      | 3534                            | 2           | No                     | NA                                                                 | NR                                     |
| Barrera, 2011 (CR: Toobert, 2012)           | USA     | RCT          | Research funding body             | NR           | 104                      | single site; community           | Health maintenance organization                          | 279                             | 2           | Yes                    | sustainability of intervention effects                             | Maintain, Sustain, Support, Continue   |
| Gibson, 2011                                | USA     | Case-control | Commercial organisation           | 2006 to 2008 | 157                      | single site; community           | Diabetes disease management program                      | 2204                            | 2           | No                     | NA                                                                 | Adhere                                 |
| Kim, 2011 (CR: Kim, 2008)                   | USA     | RCT          | Governmental organisation, Other  | NR           | 65                       | multi-site; community            | Self-Help Intervention Program                           | 397                             | 2           | Yes                    | sustainability of those intervention outcomes or long-term effects | Sustain, Long term                     |
| Chen, 2010 (CR: Gilmore, 2007; Chung, 2003) | USA     | Cohort       | Health-care provider organisation | 1998 to 2007 | 209                      | multi-site; clinic               | Commercial Preferred Provider Organization health plan   | NR (NR)                         | 2           | No                     | NA                                                                 | Sustain                                |

|                    |                 |             |                                                  |              |            |                                       |                                                   |                     |   |     |                                                |                              |
|--------------------|-----------------|-------------|--------------------------------------------------|--------------|------------|---------------------------------------|---------------------------------------------------|---------------------|---|-----|------------------------------------------------|------------------------------|
| Desouza, 2010      | USA             | Cohort      | NR                                               | 2004 to 2008 | 104        | single site; clinic                   | Shared medical appointment at diabetes clinic     | 56                  | 2 | No  | NA                                             | Maintain, Long term          |
| Hughes, 2010       | USA             | RCT         | Governmental organisation                        | NR           | 78         | multi-site; hospital, home, community | Hospital and home                                 | 419                 | 4 | No  | NA                                             | Long term, Maintain          |
| Huizinga, 2010     | USA             | RCT         | Governmental organisation                        | 2002 to 2006 | 104        | single site; clinic                   | Urban area surrounding an academic medical centre | 164                 | 3 | No  | NA                                             | Long term                    |
| Wisse, 2010        | The Netherlands | RCT         | NR                                               | NR           | 104        | single site; clinic                   | NR                                                | 61                  | 2 | No  | NA                                             | NR                           |
| Xian, 2010         | USA             | Cohort      | Commercial organisation, Research funding body   | 2004 to 2007 | 157        | multi-site; hospital                  | Continuous quality improvement program            | NR (2878 hospitals) | 2 | Yes | sustained performance over time                | Sustain                      |
| Chavannes, 2009    | The Netherlands | Cohort      | Mixed                                            | NR           | 104        | multi-site; clinic                    | 2 primary health care centers                     | 152                 | 2 | No  | NA                                             | Long term                    |
| Jia, 2009          | USA             | Cohort      | Research funding body, Governmental organisation | NR           | 209        | multi-site; clinic                    | 4 Veterans Affairs medical centers                | 774                 | 2 | No  | NA                                             | Long term                    |
| Olson, 2009        | USA             | RCT         | Research funding body                            | 2005 to 2007 | 104        | multi-site; clinic                    | Non-profit health maintenance organization        | 421                 | 2 | Yes | maintenance of treatment goals after discharge | Sustain, Maintain, Long term |
| Radziewicz, 2009   | USA             | RCT         | NR                                               | NR           | 78         | NR                                    | NR                                                | NR                  | 2 | No  | NA                                             | Maintain, Adhere             |
| Svetkey, 2009      | USA             | Cluster-RCT | Governmental organisation                        | 2005 to 2007 | 78         | multi-site; clinic                    | NR                                                | 574 (32)            | 4 | No  | NA                                             | Sustain                      |
| van Wetering, 2009 | Netherlands     | RCT         | Research funding body, Commercial organisation   | 2002 to 2006 | 104        | multi-site; clinic, community         | 2 general hospitals                               | 199                 | 2 | No  | NA                                             | Long term                    |
| Bocchi, 2008       | Brazil          | RCT         | NR                                               | 1999 to 2006 | 129 (mean) | single site; hospital                 | Heart Institute                                   | 350                 | 2 | No  | NA                                             | Long term                    |
| Giannuzzi, 2008    | Italy           | RCT         | Commercial organisation                          | 2001 to 2005 | 157        | multi-site; clinic                    | 78 Italian cardiac rehabilitation centers         | 3241                | 2 | No  | NA                                             | Maintain, Long term          |

|                      |           |             |                                                                           |              |                 |                               |                                                         |           |   |     |                                                                                                                                                                   |                                   |
|----------------------|-----------|-------------|---------------------------------------------------------------------------|--------------|-----------------|-------------------------------|---------------------------------------------------------|-----------|---|-----|-------------------------------------------------------------------------------------------------------------------------------------------------------------------|-----------------------------------|
| Lawrence, 2008       | US        | Cohort      | NR                                                                        | 2004 to 2006 | 74              | multi-site; community         | Longitudinal Adherence Treatment Evaluation program     | 155       | 2 | No  | NA                                                                                                                                                                | NR                                |
| Mildestvedt, 2008    | Norway    | RCT         | Voluntary body                                                            | 2000 to 2002 | 104             | single site; chronic care     | Rehabilitation Centre                                   | 176       | 2 | No  | NA                                                                                                                                                                | Long term                         |
| Berg, 2007           | USA       | Cohort      | Commercial organisation                                                   | 2000 to 2002 | 104             | multi-site; clinic, home      | Hospitalization or an emergency department visit        | 1220      | 2 | No  | NA                                                                                                                                                                | NR                                |
| Chin, 2007           | USA       | Cluster-RCT | Governmental organisation, Research funding body                          | 1998 to 2002 | 52 to 104 (209) | multi-site; clinic, community | 34 community health centers                             | 2417 (34) | 2 | Yes | what happens over longer time periods [more than 1 year]- whether improvements in care can be sustained and if certain outcome goals may take more time to attain |                                   |
| Del Sindaco, 2007    | Italy     | RCT         | NR                                                                        | 2001 to 2004 | 104             | multi-site; clinic, home      | 2 hospital heart failure clinics                        | 173       | 2 | No  | NA                                                                                                                                                                | Sustain, Long term                |
| Dennison, 2007       | USA       | RCT         | Commercial organisation, Research funding body, Governmental organisation | NR           | 261             | single site; clinic, home     | High-risk, underserved young urban African American men | 309       | 2 | No  | NA                                                                                                                                                                | NR                                |
| Getprechas was, 2007 | Thailand  | Cohort      | Governmental organisation                                                 | 2002 to 2006 | 157             | multi-site; clinic            | 3 primary care units                                    | 465       | 3 | Yes | NA                                                                                                                                                                | Sustain                           |
| Hess, 2007           | USA       | NRCT        | Mixed                                                                     | 2003 to 2005 | 61              | single site; community        | Black-owned barbershops                                 | 308       | 2 | No  | NA                                                                                                                                                                | Sustain                           |
| Bailie, 2006         | Australia | Cohort      | Governmental organisation, Research                                       | 1995 to 2002 | 339             | multi-site; clinic, community | Community health centers                                | 98        | 2 | Yes | maintenance of health                                                                                                                                             | Sustain, Maintain, Mesurable gain |

|                   |           |        | funding body                                                 |              |           |                               |                                                      |             |   |    | benefits/outcomes |                    |
|-------------------|-----------|--------|--------------------------------------------------------------|--------------|-----------|-------------------------------|------------------------------------------------------|-------------|---|----|-------------------|--------------------|
| Inglis, 2006      | Australia | RCT    | Charitable trust                                             | 1995 to 1998 | 522       | single site; clinic           | Tertiary referral center                             | 297         | 2 | No | NA                | Long term, Adhere  |
| Montero, 2005     | Spain     | RCT    | NR                                                           | NR           | 522       | single site; hospital         | Hospital                                             | 180         | 2 | No | NA                | Long term          |
| Phillips, 2005    | USA       | RCT    | Governmental organisation                                    | 1999 to 2002 | 157       | single site; clinic           | Multispecialty group                                 | 4138        | 4 | No | NA                | NR                 |
| Bakitas, 2004     | USA       | Cohort | Voluntary body                                               | 1998 to 2001 | 78        | multi-site; hospital          | 3 Medical practices                                  | 380         | 2 | No | NA                | Continue, Plan     |
| Fihn, 2004        | USA       | RCT    | Governmental organisation                                    | 1997 to 1999 | 104       | multi-site; clinic            | 7 Veterans Affairs medical centers                   | 9019        | 2 | No | NA                | Sustain            |
| Jovanovic, 2004   | USA       | RCT    | Health-care provider organisation, Governmental organisation | 1995 to 1999 | 157       | multi-site; clinic            | 3 clinical sites                                     | 358         | 2 | No | NA                | NR                 |
| Behnke, 2003      | Germany   | RCT    | Governmental organisation, Research funding body             | NR           | 78        | multi-site; hospital, home    | NR                                                   | 26          | 2 | No | NA                | Long term, Sustain |
| Gaede, 2003       | Denmark   | RCT    | NR                                                           | 1993 to 2001 | 407       | single site; clinic           | Project team at Diabetes Center                      | 160         | 2 | No | NA                | Long term          |
| Gary, 2003        | USA       | RCT    | Research funding body, Health-care provider organisation     | 1995 to 1999 | 104       | single site; clinic, home     | Predominately African American, inner-city community | 186         | 4 | No | NA                | Surpass            |
| Allen-Ramey, 2002 | USA       | Cohort | Health-care provider organisation                            | 1993 to 1995 | 104       | multi-site; clinic, community | 16 managed care organizations                        | 3013        | 2 | No | NA                | Maintain           |
| Froehlich, 2002   | USA       | Cohort | NR                                                           | 1993 to 1998 | 60 to 104 | multi-site; hospital          | NR                                                   | 300         | 3 | No | NA                | Sustain, Long term |
| Baker, 2001       | USA       | Cohort | NR                                                           | 1998 to 1999 | 95        | multi-site; clinic            | Multispecialty group practice                        | 13325 (190) | 2 | No | NA                | Sustain            |
| Coleman, 2001     | USA       | RCT    | Research funding body, Commercial organisation               | 1995 to 1996 | 104       | multi-site; clinic            | Group-model health maintenance organization          | 295         | 2 | No | NA                | NR                 |
| Hedges, 2000      | USA       | RCT    | Governmental organisation, Commercial organisation           | NR           | 78        | multi-site; community         | 44 hospitals                                         | 3013        | 2 | No | NA                | Sustain            |

|                    |           |           |                                             |              |         |                           |                                                                                          |     |        |     |                                                     |                    |
|--------------------|-----------|-----------|---------------------------------------------|--------------|---------|---------------------------|------------------------------------------------------------------------------------------|-----|--------|-----|-----------------------------------------------------|--------------------|
| Rowley, 2000       | Australia | Cohort    | Governmental organisation                   | 1993 to 1997 | 104     | single site; community    | Looma Healthy Lifestyle (diabetes programme)                                             | 49  | 2      | No  | NA                                                  | NR                 |
| Skinner, 2000      | USA       | Quasi-RCT | Research funding body                       | 1995 to 1997 | 157     | multi-site                | 2 sites affiliated with the System to Assure Elder Services (STAES) program              | 152 | 2      | No  | NA                                                  | Sustain, Adhere    |
| Stroebel, 2000     | USA       | Cohort    | NR                                          | 1997 to 1999 | 117     | single site; clinic       | Multispecialty group practice                                                            | 867 | 2 (40) | No  | NA                                                  | Sustain            |
| Daniel, 1999       | Canada    | CBA       | Governmental organisation, Charitable trust | 1994 to 1996 | 70      | multi-site; community     | 3 matched communities                                                                    | 207 | 2      | No  | NA                                                  | Limited time       |
| Grosbois, 1999     | France    | Cohort    | NR                                          | NR           | 78      | single site; clinic, home | Rehabilitation hospital                                                                  | 58  | 4      | No  | NA                                                  | Long term, Sustain |
| Higginbotham, 1999 | Australia | Cohort    | Governmental organisation                   | 1984 to 1994 | 522     | single site; community    | Coalfields Healthy Heartbeat (CHHB) community action program                             | NR  | 2      | Yes | sustainability of activities                        | Long term, Sustain |
| Pill, 1998         | UK        | RCT       | Research funding body                       | 1993 to 1996 | 104     | multi-site; clinic        | 30 practices                                                                             | 190 | 2      | No  | NA                                                  | Sustain            |
| Corkery, 1997      | USA       | RCT       | NR                                          | NR           | 4 to 70 | single site; clinic       | Nurse-managed diabetes management clinic (                                               | 64  | 2      | No  | NA                                                  | Sustain, Long      |
| Kelso, 1996        | USA       | NRCT      | NR                                          | 1992 to 1995 | 104     | multi-site; clinic        | From local teaching hospitals, referrals, and through local public service announcements | 39  | 2      | No  | NA                                                  | Long term          |
| Reichard, 1996     | Sweden    | RCT       | NR                                          | NR           | 522     | single site; clinic       | NR                                                                                       | 102 | 2      | Yes | clarify whether the results reported earlier remain | Long term          |

when the  
treatment  
groups  
have  
returned to  
routine  
care

|                   |        |        |                                                                 |                 |            |                                             |                                               |      |   |    |    |                       |
|-------------------|--------|--------|-----------------------------------------------------------------|-----------------|------------|---------------------------------------------|-----------------------------------------------|------|---|----|----|-----------------------|
| Erfurt, 1990      | USA    | Cohort | Governmental<br>organisation,<br>Commercial<br>organisation     | 1985 to<br>1988 | 157        | multi-site;<br>community                    | 14<br>manufacturing<br>plants                 | 7804 | 4 | No | NA | Long term,<br>Sustain |
| Perk, 1989        | Sweden | Cohort | NR                                                              | 1983 to<br>1985 | 104 (>209) | single site;<br>hospital                    | District<br>Hospital                          | 40   | 2 | No | NA | Long term             |
| Hopper,<br>1984   | USA    | RCT    | NR                                                              | 1979 to<br>1980 | 78 (NR)    | single site;<br>clinic                      | NR                                            | 227  | 2 | No | NA | NR                    |
| Weiss, 1984       | USA    | RCT    | Health-care<br>provider<br>organisation                         | 1978 to<br>1983 | 157        | multi-site;<br>hospital,<br>chronic<br>care | Long-Term<br>Care<br>Demonstration<br>Program | 338  | 2 | No | NA | NR                    |
| Ambrosio,<br>1983 | Italy  | Cohort | NR                                                              | NR              | 261        | single site;<br>community                   | District<br>Hospital                          | 5856 | 2 | No | NA | Long term             |
| Morisky,<br>1983  | USA    | RCT    | Research<br>funding body                                        | 1974 to<br>1979 | 261        | multi-site;<br>clinic                       | Internal<br>medical clinic                    | 400  | 8 | No | NA | Comply, Adhere        |
| Krishan,<br>1979  | USA    | Cohort | Health-care<br>provider<br>organisation,<br>Charitable<br>trust | 1974 to<br>1975 | 52 to 104  | multi-site;<br>community                    | 3 non-<br>contiguous<br>rural<br>communities  | 1392 | 3 | No | NA | NR                    |

**Abbreviations:** CR – Companion Report NR – Not reported; RCT – Randomised controlled trial; NA – Not available; CBA – Controlled before-after; NRCT – Non-randomized controlled trial
