# Supplementary material for: Sustainability of knowledge translation interventions in healthcare decision-making: a scoping review
Source: PubMed Central journal article supplement (PMC4839064; doi:10.1186/s13012-016-0421-7), 2016-04-21
Supplement: 13012_2016_421_MOESM5_ESM.pdf [file 13012_2016_421_MOESM5_ESM.pdf]

## Appendix 5. Patient Characteristics

| First Author, Year | End users                   | Mean Age-Pxs (yrs) | Age Range | % Female | Chronic Disease                          | Co-morbidity/Risk Factor                                    | History of Treatment Usage         | Concomitant Therapies | Other Inclusion Criteria                                                                                                                                                                                                                                                                                                                                                                                                                                                                                                                                                                                                                                                                                                                                                                                                                                                                                                                                                                                                                                                                                                                                                                                                    |
|--------------------|-----------------------------|--------------------|-----------|----------|------------------------------------------|-------------------------------------------------------------|------------------------------------|-----------------------|-----------------------------------------------------------------------------------------------------------------------------------------------------------------------------------------------------------------------------------------------------------------------------------------------------------------------------------------------------------------------------------------------------------------------------------------------------------------------------------------------------------------------------------------------------------------------------------------------------------------------------------------------------------------------------------------------------------------------------------------------------------------------------------------------------------------------------------------------------------------------------------------------------------------------------------------------------------------------------------------------------------------------------------------------------------------------------------------------------------------------------------------------------------------------------------------------------------------------------|
| Allen-Ramey, 2002  | Patients/public; Clinicians | 46.6               | ≥18       | 70.9     | Asthma                                   | NR                                                          | 70-80% use inhaled corticosteroids | NR                    | age 18 years or older as of September 1, 1993; enrollment in the MCO at the time of sampling; enrollment in the MCO at the time of sampling                                                                                                                                                                                                                                                                                                                                                                                                                                                                                                                                                                                                                                                                                                                                                                                                                                                                                                                                                                                                                                                                                 |
| Ambrosio, 1983     | Patients/public; Clinicians | NR                 | 20-64     | 48       | Hypertension                             | NR                                                          | NR                                 | NR                    | NR                                                                                                                                                                                                                                                                                                                                                                                                                                                                                                                                                                                                                                                                                                                                                                                                                                                                                                                                                                                                                                                                                                                                                                                                                          |
| Bailie, 2006       | Patients/public; Clinicians | NR                 | NR        | NR       | Cardiovascular disease and Renal disease | Diabetes, Hypertension, and Albuminuria                     | NR                                 | NR                    | NR                                                                                                                                                                                                                                                                                                                                                                                                                                                                                                                                                                                                                                                                                                                                                                                                                                                                                                                                                                                                                                                                                                                                                                                                                          |
| Baker, 2001        | Clinicians                  | 60                 | NR        | 52       | Diabetes                                 | Cardiac comorbidity, Renal comorbidity, and Eye comorbidity | oral agent, insulin                | NR                    | Adult patients older than 18 years were identified for inclusion in the DCMSS if in the past 24 months they had had two encounters with a medical group physician for their diabetes care (two encounters with a corresponding ICD-9-CM diagnostic code of 250) or a claim for either insulin or an oral hypoglycemia drug. To ensure the most complete information possible for each patient, we limited the study population to those enrolled in the medical group's affiliated 1, 1998; this resulted in the identification of 17,328 patients with diabetes. We further limited the sample to patients who were continuously enrolled in the HMO from November 1, 1997, to October 31, 1999, thereby including only established HMO patients for whom complete information was available in both the baseline and study year. The resulting evaluation sample consisted of 13,325 adult HMO patients with diabetes who were aligned to 190 PCPs practicing in 31 ambulatory care clinics. Table 1 (p 182) presents the sociodemographic and clinical characteristics of the study cohort, along with the diabetes-related routine monitoring and screening service receipt among the population for the baseline year. |
| Baker, 2011        | Patients/public; Clinicians | NR                 | NR        | NR       | Diabetes, COPD, and CHF                  | NR                                                          | NR                                 | NR                    | A primary goal of CMS's selection algorithm was to identify patients who had evidence of congestive heart failure, chronic obstructive pulmonary disease, or diabetes mellitus—three conditions targeted by the CMS demonstration project. The selection algorithm required that intervention patients receive most of their care at the study clinics. It identified appropriate                                                                                                                                                                                                                                                                                                                                                                                                                                                                                                                                                                                                                                                                                                                                                                                                                                           |

|                    |                             |      |                             |      |          |                                                                                                    |                                                                                                      |    |                                                                                                                                                                                                                                                                                                                                                                                                                                                                                                                                                                                                                                                                                                                                                                                                                                                                                                                                                                                                                                                                                                                                 |
|--------------------|-----------------------------|------|-----------------------------|------|----------|----------------------------------------------------------------------------------------------------|------------------------------------------------------------------------------------------------------|----|---------------------------------------------------------------------------------------------------------------------------------------------------------------------------------------------------------------------------------------------------------------------------------------------------------------------------------------------------------------------------------------------------------------------------------------------------------------------------------------------------------------------------------------------------------------------------------------------------------------------------------------------------------------------------------------------------------------------------------------------------------------------------------------------------------------------------------------------------------------------------------------------------------------------------------------------------------------------------------------------------------------------------------------------------------------------------------------------------------------------------------|
|                    |                             |      |                             |      |          |                                                                                                    |                                                                                                      |    | high-risk, high-cost patients while excluding others who would not be candidates for interacting with the program.                                                                                                                                                                                                                                                                                                                                                                                                                                                                                                                                                                                                                                                                                                                                                                                                                                                                                                                                                                                                              |
| Bakitas, 2004      | Patients/public             | NR   | NR                          | NR   | Cancer   | NR                                                                                                 | NR                                                                                                   | NR | 1. Diagnosis of stage IV, metastatic, or recurrent breast cancer; stage IIIB/IV non-small-cell or extensive stage small cell lung cancer; unresectable colon, pancreatic, biliary, hepatic cancer;<br>2. Able to speak and read or understand English;<br>3. Age 18 or older;<br>4. Receiving oncology care from the site                                                                                                                                                                                                                                                                                                                                                                                                                                                                                                                                                                                                                                                                                                                                                                                                       |
| Barrera, 2011      | Patients/public             | 61   | 39-74                       | 100  | Diabetes | NR                                                                                                 | NR                                                                                                   | NR | NR                                                                                                                                                                                                                                                                                                                                                                                                                                                                                                                                                                                                                                                                                                                                                                                                                                                                                                                                                                                                                                                                                                                              |
| Behnke, 2003       | Patients/public             | 66.3 | NR                          | 23.1 | COPD     | NR                                                                                                 | 22 patients taking theophylline and/or oral corticosteroids                                          | NR | NR                                                                                                                                                                                                                                                                                                                                                                                                                                                                                                                                                                                                                                                                                                                                                                                                                                                                                                                                                                                                                                                                                                                              |
| Belardinelli, 2012 | Patients/public             | 59   | included adults and elderly | 21.9 | CHF      | NR                                                                                                 | angiotensin-converting enzyme; angiotensin II antagonist; beta-blocker; digitalis; diuretic; statins | NR | clinical stability for 3 months before enrollment, left ventricular ejection fraction (LVEF) of less than 40%, and ability to exercise                                                                                                                                                                                                                                                                                                                                                                                                                                                                                                                                                                                                                                                                                                                                                                                                                                                                                                                                                                                          |
| Berg, 2007         | Patients/public; Clinicians | 73.9 | ≥65                         | 62   | Diabetes | Hypertension, Coronary artery disease, COPD, Diabetic retinopathy, and Peripheral vascular disease | ACE-inhibitors, beta-blockers, antihypertensives, diuretics, blood boucose regulators                | NR | Patients who opted out before having an initial assessment were included in the intervention group to reflect an intent to treat evaluation approach for the contacted members.<br>Members of a MedicareChoice health plan residing in Ohio, Indiana, or Kentucky who had a hospitalization or an emergency de- partment visit for which diabetes was one of the diagnoses as determined by medical claims review in the past year;<br>• Members from the above who are not engaged in a local formal diabetes program;<br>• Members aged 65 years or older • Health plan enrollment at least 3 months prior to being contacted to be in the study and at least 3 months of health plan partici- pation after being contacted to be in the study . • Patients residing in a long-term skilled nurs- ing facility (SNF), participating in a hospice program, or who were identified as having end-stage renal disease, dialysis, transplants, AIDS, claims costs > \$100,000, or malignant cancer were excluded. Long-term SNF stays, defined as longer than 30 days, were used as an exclusion criterion as a telephonic inter- |

|              |                 |      |     |      |    |                                                       |                                                                                                                                                                                                              |                                                                                                                                                                                                                                                                                                                                                                                                                                                                                                                                            |                                                                                                                                                                                                                                                                            |
|--------------|-----------------|------|-----|------|----|-------------------------------------------------------|--------------------------------------------------------------------------------------------------------------------------------------------------------------------------------------------------------------|--------------------------------------------------------------------------------------------------------------------------------------------------------------------------------------------------------------------------------------------------------------------------------------------------------------------------------------------------------------------------------------------------------------------------------------------------------------------------------------------------------------------------------------------|----------------------------------------------------------------------------------------------------------------------------------------------------------------------------------------------------------------------------------------------------------------------------|
|              |                 |      |     |      |    |                                                       |                                                                                                                                                                                                              |                                                                                                                                                                                                                                                                                                                                                                                                                                                                                                                                            | vention was considered impractical.<br><ul style="list-style-type: none"> <li>• Patients who opted out before having an initial assessment were included in the intervention group to reflect an intent to treat evaluation approach for the contacted members.</li> </ul> |
| Bocchi, 2008 | Patients/public | 50.7 | ≥18 | 31.2 | HF | Diabetes, COPD, Alcoholic, Chagasic, and Hypertensive | Amiodarone, Amlodipine, ARA, Oral anticoagulant, ACEI, beta-Blocker, Spironolactone, Hydralazine, Nitrates, Digoxin, Diuretics, Furosemide, Statin, Oral antidiabetic therapy, Insulin, Oral thyroid hormone | Standard follow-up medical visits for the intervention and control groups were performed during the study period by the same ambulatory cardiology team, which was not informed of the randomization. The scheduled interval between routine ambulatory evaluations was 3 to 4 months. Also, the ambulatory team did not participate in any step of the study. The ambulatory cardiology team was oriented to follow Brazilian Guidelines and standard treatment of the Heart Failure Clinics in the management of patients. Complementary | irreversible chronic HF of at least 6 months' duration                                                                                                                                                                                                                     |

|               |                             |       |          |      |                                                              |                                                                            |                              |                                                                                                                                                                                                                                                                                    |                                                                                                                                                                                                                                                                                                                                                                                                                                                                                                                                                                                                          |
|---------------|-----------------------------|-------|----------|------|--------------------------------------------------------------|----------------------------------------------------------------------------|------------------------------|------------------------------------------------------------------------------------------------------------------------------------------------------------------------------------------------------------------------------------------------------------------------------------|----------------------------------------------------------------------------------------------------------------------------------------------------------------------------------------------------------------------------------------------------------------------------------------------------------------------------------------------------------------------------------------------------------------------------------------------------------------------------------------------------------------------------------------------------------------------------------------------------------|
|               |                             |       |          |      |                                                              |                                                                            |                              | follow-up visits were carried out, depending on each patient's needs and on the decision of the attending cardiologist. When nurses detected noncompliance or worsening of the clinical condition, an unscheduled visit to the patient's attending cardiologist could be proposed. |                                                                                                                                                                                                                                                                                                                                                                                                                                                                                                                                                                                                          |
| Chen, 2010    | Clinicians                  | NR    | NR       | NR   | HF, and diabetes                                             | NR                                                                         | NR                           | NR                                                                                                                                                                                                                                                                                 | NR                                                                                                                                                                                                                                                                                                                                                                                                                                                                                                                                                                                                       |
| Cheng, 2012   | Clinicians                  | 63.9  | ≥18      | 56.7 | Diabetes                                                     | NR                                                                         | NR                           | NR                                                                                                                                                                                                                                                                                 | Patients with diabetes who had been enrolled in the nationwide P4P program in 2005 were defined as the intervention group (N = 20,934). The index date for each patient was defined as the date that they were first enrolled in the P4P program between January 1, 2005 and December 31, 2005. To examine the long-term effects of the P4P program, we created 2 sets of samples: one for all of the participants regardless of their enrollment status in the subsequent years and the other for those who participated and stayed in the program throughout the observation period from 2005 to 2009. |
| Chin, 2007    | Patients/public; Clinicians | 56.2  | 18-75    | 63   | Diabetes                                                     | Hypertension, MI, Retinopathy, Neuropathy, and Peripheral vascular disease | ACE inhibitor, aspirin, etc. | NR                                                                                                                                                                                                                                                                                 |                                                                                                                                                                                                                                                                                                                                                                                                                                                                                                                                                                                                          |
| Coleman, 2001 | Patients/public; Clinicians | 74.05 | NR       | 59   | Asthma, COPD, CHF, Diabetes, Heart disease, and Hypertension | NR                                                                         | NR                           | NR                                                                                                                                                                                                                                                                                 | were patients of a participating physician. older adults with chronic illness and a history of frequent utilization of outpatient services, patients of a participating physician                                                                                                                                                                                                                                                                                                                                                                                                                        |
| Corkery, 1997 | Patients/public; Clinicians | 52.8  | 21 to 76 | 74   | Diabetes                                                     | NR                                                                         | NR                           | NR                                                                                                                                                                                                                                                                                 | NR                                                                                                                                                                                                                                                                                                                                                                                                                                                                                                                                                                                                       |

|                   |                             |       |       |      |              |                                                               |                                                                                                                                        |                                                                                                                                                                                                                                                                                                                                                                                                                                                                                  |                                                                                                                                                                                                               |
|-------------------|-----------------------------|-------|-------|------|--------------|---------------------------------------------------------------|----------------------------------------------------------------------------------------------------------------------------------------|----------------------------------------------------------------------------------------------------------------------------------------------------------------------------------------------------------------------------------------------------------------------------------------------------------------------------------------------------------------------------------------------------------------------------------------------------------------------------------|---------------------------------------------------------------------------------------------------------------------------------------------------------------------------------------------------------------|
| Daniel, 1999      | Patients/public             | 47.1  | 18-80 | 65.7 | Diabetes     | Diabetes, and Family history of diabetes                      | NR                                                                                                                                     | NR                                                                                                                                                                                                                                                                                                                                                                                                                                                                               | NR                                                                                                                                                                                                            |
| Del Sindaco, 2007 | Patients/public; Clinicians | 77.5  | ≥ 70  | 48   | HF           | Hypertension, Diabetes, MI, COPD, and Valvular heart disease  | ACE-inhibitors, angiotensin receptor blockers, beta-blockers, furosemide, spironolactone, digoxin, amiodarone, nitrates anticoagulants | All patients were discharged on optimised therapy and received a detailed summary and a standardised educational programme focused on a low-salt diet and drug therapy, self-monitoring of blood pressure and symptoms, daily weight, smoke cessation, fluid intake and daily physical activity. An ad-hoc translated and validated local version of the European Heart Failure Self-Care Behaviour Scale was administered in order to evaluate the baseline level of self-care. | discharged home after a hospitalisation due to heart failure, defined as an admission in New York Heart Association (NYHA) functional class III – IV of at least 24 h requiring specific intravenous therapy. |
| Dennison, 2007    | Patients/public; Clinicians | 41    | 21-54 | 0    | Hypertension | Smoker, High-salt diet, Diabetes, Hyperlipidemia, and Obesity | antihypertensives                                                                                                                      | NR                                                                                                                                                                                                                                                                                                                                                                                                                                                                               |                                                                                                                                                                                                               |
| Desouza, 2010     | Patients/public             | 66.4  | NR    | NR   | Diabetes     | NR                                                            | 85% insulin, 15% two or more oral medications                                                                                          | NR                                                                                                                                                                                                                                                                                                                                                                                                                                                                               | Patients were included in the study if their A1c at discharge was <7 and had subsequent outcome data available every 6 months for a period of 2 years.                                                        |
| Erfurt, 1990      | Patients/public             | 39-43 | 39-43 | NR   | Hypertension | Obesity, and Smoker                                           | NR                                                                                                                                     | NR                                                                                                                                                                                                                                                                                                                                                                                                                                                                               | NR                                                                                                                                                                                                            |

|                     |                             |       |       |      |                                                       |                                                                      |                                                                                                                                                                                 |    |                                                                                                                                                                                                                                                                                                                                                                                                                                                                       |
|---------------------|-----------------------------|-------|-------|------|-------------------------------------------------------|----------------------------------------------------------------------|---------------------------------------------------------------------------------------------------------------------------------------------------------------------------------|----|-----------------------------------------------------------------------------------------------------------------------------------------------------------------------------------------------------------------------------------------------------------------------------------------------------------------------------------------------------------------------------------------------------------------------------------------------------------------------|
| Fihn, 2004          | Clinicians                  | 65    | ≥65   | 3    | Coronary artery disease, Hypertension, Diabetes, COPD | Hypertension, Diabetes, Angina, Depression, and COPD                 | NR                                                                                                                                                                              | NR | All enrolled patients who visited their assigned primary care providers at least once during the prior year were eligible for the study.                                                                                                                                                                                                                                                                                                                              |
| Froehlich, 2002     | Clinicians                  | 67.3  | NR    | 25   | Cardiovascular diseases                               | Diabetes, CHF, MI, Occlusive aortic disease, and Aortic aneurysm     | NR                                                                                                                                                                              | NR | NR                                                                                                                                                                                                                                                                                                                                                                                                                                                                    |
| Gaede, 2003         | Patients/public             | 55.1  | NR    | 26   | T2DM, and Cardiovascular disease                      | T2DM, Microalbuminuria, Neuropathy, Hypertension, and Smoker         | ACE inhibitor, Angiotensin II-receptor antagonist, Diuretic, Calcium-channel blocker, Beta-blocker                                                                              | NR | NR                                                                                                                                                                                                                                                                                                                                                                                                                                                                    |
| Gary, 2003          | Patients/public; Clinicians | 59    | 35-75 | 77   | T2DM                                                  | Hypertension, Hyperlipidemia, and Smoker                             | insulin, oral hypoglycemic agents, blood pressure medication, cholesterol medication                                                                                            | NR | Eligibility for the trial was determined by medical chart review and two screening visits. Age (35–75), African American ancestry, presence of type 2 diabetes (as indicated by physician diagnosis), and residence in one of seven East Baltimore zip codes were preliminary eligibility criteria. In addition, all participants attended either the Johns Hopkins Outpatient Center or the East Baltimore Medical Center for primary care within the previous year. |
| Getprechaswas, 2007 | Patients/public; Clinicians | NR    | 18-59 | 63.6 | Hypertension                                          | Smoking, and Alcohol consumption                                     | NR                                                                                                                                                                              | NR | NR                                                                                                                                                                                                                                                                                                                                                                                                                                                                    |
| Giannuzzi, 2008     | Patients/public; Clinicians | 57.9  | ≤75   | 13.7 | MI                                                    | Diabetes, Hypertension, Hypercholesterolemia, Overweight, and Smoker | aspirin, other antiplatelet agents, calcium channel blockers, beta blockers, nitrates, diuretics, ACE inhibitors, oral antidiabetic drugs, insulin, lipid-lowering agents, PUFA | NR | Patients enrolled in the GOSPEL Study who had had a recent MI (within 3 months) were routinely referred to a cardiac rehabilitation center, residential or ambulatory, irrespective of revascularization procedures received after the index event                                                                                                                                                                                                                    |
| Gibson, 2011        | Patients/public; Clinicians | 47.75 | NR    | 41.2 | Diabetes                                              | NR                                                                   | NR                                                                                                                                                                              | NR | NR                                                                                                                                                                                                                                                                                                                                                                                                                                                                    |
| Grosbois, 1999      | Patients/public             | 62.2  | NR    | 19   | COPD                                                  | NR                                                                   | NR                                                                                                                                                                              | NR | dyspnea on exertion limiting activities of daily living, postbronchodilator forced expiratory volume in one second (FEV1) less than 70% of predicted values, respiratory stable condition with optimal drug management, and no evidence of ischemic heart disease or musculoskeletal disorders.                                                                                                                                                                       |
| Hedges, 2000        | Patients/public; Clinicians | NR    | >30   | 36.3 | AMI                                                   | Coronary heart disease                                               | NR                                                                                                                                                                              | NR | Patients transferred from a study hospital for further evaluation or treatment were included                                                                                                                                                                                                                                                                                                                                                                          |

|                    |                             |      |           |      |                        |                                                                                          |                                                                   |    |                                                                                                                                                                                                                                                                                                                                                                                                                                                                                                                                               |
|--------------------|-----------------------------|------|-----------|------|------------------------|------------------------------------------------------------------------------------------|-------------------------------------------------------------------|----|-----------------------------------------------------------------------------------------------------------------------------------------------------------------------------------------------------------------------------------------------------------------------------------------------------------------------------------------------------------------------------------------------------------------------------------------------------------------------------------------------------------------------------------------------|
|                    |                             |      |           |      |                        |                                                                                          |                                                                   |    | when data abstraction could be completed at the second hospital.                                                                                                                                                                                                                                                                                                                                                                                                                                                                              |
| Hess, 2007         | Patients/public             | NR   | NR        | 0    | Hypertension           | NR                                                                                       | NR                                                                | NR | NR                                                                                                                                                                                                                                                                                                                                                                                                                                                                                                                                            |
| Higginbotham, 1999 | Patients/public             | NR   | NR        | NR   | Coronary heart disease | Smoking, Physical inactivity, BMI, Diastolic blood pressure, and Systolic blood pressure | NR                                                                | NR | NR                                                                                                                                                                                                                                                                                                                                                                                                                                                                                                                                            |
| Hopper, 1984       | Patients/public; Clinicians | 46.5 | NR        | 73.5 | Diabetes               | NR                                                                                       | NR                                                                | NR | NR                                                                                                                                                                                                                                                                                                                                                                                                                                                                                                                                            |
| Hughes, 2010       | Patients/public             | 71.1 | 59-91     | 86.6 | Osteoarthritis         | Hypertension, diabetes, and Cardiovascular disease                                       | NR                                                                | NR | NR                                                                                                                                                                                                                                                                                                                                                                                                                                                                                                                                            |
| Huizinga, 2010     | Patients/public             | 55.1 | 18-75     | 44   | Diabetes               | Obesity                                                                                  | insulin, metformin, sulfonylurea, thiazolidinedione, meglitinides | NR | Patients who had been referred to the diabetes DIP by their primary care physician or endocrinologist for poor glycaemic control (HbA1c >8%) and who demonstrated significant improvement ( $\geq 1\%$ decline in HbA1c) during the DIP were recruited for the study. The DIP is a usual-care diabetes management programme offered within the academic medical centre and consists of a physician-led team, including a nurse practitioner, a registered dietitian and a diabetes nurse, and has been described previously. English speaking |
| Inglis, 2006       | Patients/public; Clinicians | 75   | NR        | 44   | Chronic heart failure  | Hypertension, MI, Diabetes, and Chronic airways disease                                  | NR                                                                | NR | discharged to home, and had a diagnosis of CHF (determined by a cardiologist) and a history of 1 admission for acute heart failure.                                                                                                                                                                                                                                                                                                                                                                                                           |
| Jia, 2009          | Patients/public             | 67.6 | NR        | 1.7  | Diabetes               | CHF, COPD, Hypertension, Asthma, and Angina                                              | NR                                                                | NR | NR                                                                                                                                                                                                                                                                                                                                                                                                                                                                                                                                            |
| Jovanovic, 2004    | Patients/public; Clinicians | 57   | $\geq 18$ | 71.9 | Diabetes               | Smoking, Ethnic minority, and Low education < high school 40%                            | NR                                                                | NR | individuals 18 years or older who had type 2 diabetes of at least 1 year duration                                                                                                                                                                                                                                                                                                                                                                                                                                                             |
| Kelso, 1996        | Patients/public             | 38.2 | $\geq 18$ | 79.5 | asthma                 | African American                                                                         | inhaled corticosteroid, oral corticosteroids, theophylline        | NR | Inclusion criteria included being an African-American adult ( $\geq 18$ years of age), meeting NIH 1 criteria for moderate to severe asthma, and frequent ED visits ( $\geq 5$ in the previous 2 years or 3 in the previous 12 months) or hospitalizations ( $\geq 2$ during the previous 2 years), or at least 1 intensive care unit (ICU) admission in the previous 2 years.                                                                                                                                                                |
| Kim, 2011          | Patients/public; Clinicians | 51.9 | 38-64     | 52.9 | Hypertension           | No job, Other disease, Family history of                                                 | blood pressure medication                                         | NR | SBP $\geq 140$ mm Hg and/or DBP $\geq 90$ mm Hg on two separate occasions or taking anti-hypertensive medication, and self-identification                                                                                                                                                                                                                                                                                                                                                                                                     |

|                   |                                                   |       |       |      |                                      |                                                                                                           |    |    |                                                                                                                                                                                                                                                                                                                                                                                                                                                                                                                                                                                                                                        |
|-------------------|---------------------------------------------------|-------|-------|------|--------------------------------------|-----------------------------------------------------------------------------------------------------------|----|----|----------------------------------------------------------------------------------------------------------------------------------------------------------------------------------------------------------------------------------------------------------------------------------------------------------------------------------------------------------------------------------------------------------------------------------------------------------------------------------------------------------------------------------------------------------------------------------------------------------------------------------------|
|                   |                                                   |       |       |      |                                      | hypertension, and No medical insurance                                                                    |    |    | as a Korean American.                                                                                                                                                                                                                                                                                                                                                                                                                                                                                                                                                                                                                  |
| Krishan, 1979     | Patients/public; Clinicians                       | NR    | 30-69 | NR   | Hypertension                         | NR                                                                                                        | NR | NR | referral for care from the center and household screening was recommended in persons whose levels were at or above 160mm Hg systolic or 95mm Hg diastolic, based on the average of the second and third readings. Patients who were already receiving treatment were advised to continue care with their local physicians (or, in Wabasha, if they preferred, at the Community Hypertension Clinic).                                                                                                                                                                                                                                   |
| Chavannes, 2009   | Patients/public; Clinicians                       | 63    | NR    | 37   | COPD                                 | NR                                                                                                        | NR | NR | NR                                                                                                                                                                                                                                                                                                                                                                                                                                                                                                                                                                                                                                     |
| Lawrence, 2008    | Patients/public; Clinicians                       | NR    | 18-65 | 51.6 | Cardiovascular disease, and diabetes | NR                                                                                                        | NR | NR | Eligibility for the DM programs was determined using medical and pharmacy claims data to identify patients with chronic conditions.                                                                                                                                                                                                                                                                                                                                                                                                                                                                                                    |
| Montero, 2005     | Patients/public; Clinicians                       | 51.45 | <65   | 0    | AMI                                  | Diabetes, Dyslipidemia, and Smoking                                                                       | NR | NR | diagnosed with AMI and admitted to the coronary care unit of our hospital. Enrollments were based on the American Association of Cardiovascular and Pulmonary Rehabilitation inclusion criteria: age <65 years, low-risk (hospital course without complications, absence of signs of myocardial ischemia, functional capacity >7 metabolic equivalent time [MET], ejection fraction >50%, and absence of severe ventricular arrhythmias).                                                                                                                                                                                              |
| Mildestvedt, 2008 | Patients/public                                   | 56    | NR    | 22   | Coronary heart disease               | Smoking                                                                                                   | NR | NR | NR                                                                                                                                                                                                                                                                                                                                                                                                                                                                                                                                                                                                                                     |
| Morisky, 1983     | Patients/public                                   | 53.75 | NR    | 70   | Hypertension                         | Stroke or MI, Angina or CHF, Arteriosclerotic cardiovascular disease, Diabetes mellitus, and Hypertension | NR | NR | NR                                                                                                                                                                                                                                                                                                                                                                                                                                                                                                                                                                                                                                     |
| Olson, 2009       | Patients/public; Clinicians; Health-care managers | 72    | NR    | 26   | MI                                   | Hypertension                                                                                              | NR | NR | Patients identified for inclusion in the study were those who required only yearly follow-up per the CPCRS treatment protocol. Patients had to have at least 2 consecutive LDL-C and non-high-density lipoprotein cholesterol (non-HDL-C) values at goal; the most recent value had to have been recorded within 6 months prior to study enrollment. There was no prespecified required time frame between the 2 FLPs for eligibility. The LDL-C and non-HDL-C goals were defined as <100 mg/dL and <130 mg/dL, respectively, for all patients except those with diabetes, multivessel coronary disease, at least 1 recurrent coronary |



|                  |                             |      |                              |      |              |                                                                     |                                                    |    |                                                                                                                                                                                                                                                                                                                                                                                                                                                                                        |
|------------------|-----------------------------|------|------------------------------|------|--------------|---------------------------------------------------------------------|----------------------------------------------------|----|----------------------------------------------------------------------------------------------------------------------------------------------------------------------------------------------------------------------------------------------------------------------------------------------------------------------------------------------------------------------------------------------------------------------------------------------------------------------------------------|
|                  |                             |      |                              |      |              |                                                                     |                                                    |    | event, or current smokers. For these patients, the LDL-C and non-HDL-C goals were <70 mg/dL and <100 mg/dL, respectively. Patients also were required to have controlled blood pressure within 6 months prior to study enrollment. The blood pressure goal was defined as <140/90 mm Hg for all patients except for those patients with diabetes or chronic kidney disease, for which the goal was <130/80 mm Hg.                                                                      |
| Perk, 1989       | Patients/public; Clinicians | 58.4 | 45-64                        | 10   | MI           | Hypertension, and Smoking                                           | cardiovascular drugs                               | NR | Pts regularly attending LTP (defined as attending at least 3 out of 5 training sessions during a 5-month period)                                                                                                                                                                                                                                                                                                                                                                       |
| Phillips, 2005   | Clinicians                  | 59   | NR                           | 67   | T2DM         | NR                                                                  | NR                                                 | NR | NR                                                                                                                                                                                                                                                                                                                                                                                                                                                                                     |
| Pill, 1998       | Patients/public; Clinicians | 58.1 | NR                           | 50   | Diabetes     | Hypertension                                                        | tables for diabetes, hypertension medication       | NR | aged 18-70, diagnosed > 1yr, glycosylated haemoglobin >9% at last reading, life expectancy range of at least 3 yrs.                                                                                                                                                                                                                                                                                                                                                                    |
| Radziewicz, 2009 | Patients/public; Clinicians | NR   | NR                           | NR   | Cancer       | NR                                                                  | NR                                                 | NR | NA                                                                                                                                                                                                                                                                                                                                                                                                                                                                                     |
| Reichard, 1996   | Patients/public; Clinicians | 31   | NR                           | NR   | Diabetes     | Serious retinopathy, Visual deterioration, Nephropathy, and Smoking | subcutaneous insulin, anti-hypertensive medication | NR | NR                                                                                                                                                                                                                                                                                                                                                                                                                                                                                     |
| Rothschild, 2012 | Patients/public; Clinicians | 53.7 | NR                           | 67.4 | T2DM         | Hypertension                                                        | NR                                                 | NR | Eligible participants had to be Mexican-American, participants were required to be using at least one oral medication to control their diabetes, participants were required to have health insurance or to be enrolled as a patient at a free clinic or public facility at the time of randomization.                                                                                                                                                                                  |
| Rowley, 2000     | Patients/public             | 46.9 | NR                           | 69.4 | Diabetes     | Obesity                                                             | NR                                                 | NR | NR                                                                                                                                                                                                                                                                                                                                                                                                                                                                                     |
| Skinner, 2000    | Patients/public             | 73   | NR                           | 100  | Cancer       | NR                                                                  | NR                                                 | NR | participants were women aged 45 to 69 at entry who had at least one risk factor for breast cancer (at least two during the Vanguard Phase) based on family history, age at first birth, and benign breast biopsies and who had a negative clinical breast exam and mammogram. All interested participants were screened to ensure that they were not already consuming a low-fat diet and that they were willing to make major dietary changes if randomized to the intervention group |
| Stroebel, 2000   | Patients/public; Clinicians | 67.3 | 51-80                        | 60   | Hypertension | NR                                                                  | NR                                                 | NR | NR                                                                                                                                                                                                                                                                                                                                                                                                                                                                                     |
| Svetkey, 2009    | Patients/public; Clinicians | 60.5 | adults at least 25 years old | 47   | Hypertension | Obesity                                                             | NR                                                 | NR | NR                                                                                                                                                                                                                                                                                                                                                                                                                                                                                     |

|                                                                                                                                                                                                                                  |                                                         |      |       |      |                                                                                                                                                                |                                             |                                                                                      |                       |                                                                                                                                                                                                                                                                                                              |
|----------------------------------------------------------------------------------------------------------------------------------------------------------------------------------------------------------------------------------|---------------------------------------------------------|------|-------|------|----------------------------------------------------------------------------------------------------------------------------------------------------------------|---------------------------------------------|--------------------------------------------------------------------------------------|-----------------------|--------------------------------------------------------------------------------------------------------------------------------------------------------------------------------------------------------------------------------------------------------------------------------------------------------------|
| Tamone, 2012                                                                                                                                                                                                                     | Patients/public;<br>Clinicians                          | 73.6 | 65-82 | 92.3 | Severe osteoporosis                                                                                                                                            | NR                                          | NR                                                                                   | calcium and vitamin D | Women and men who presented the criteria for prescription of teriparatide or PTH(1-84). All consenting patients who started teriparatide or PTH(1-84) from April 2008 to April 2010 were enrolled in the educational and follow-up program (intervention group).                                             |
| van Wetering, 2009                                                                                                                                                                                                               | Patients/public;<br>Clinicians                          | 66.5 | 57-76 | 29   | COPD                                                                                                                                                           | Smoking, and Obesity                        | NR                                                                                   | NR                    | Patients were recruited when 1) having an impaired exercise capacity, defined as peak work load (Wmax) during incremental cycle ergometry of less than 70 percent of the predicted normal value, 2) having GOLD stage 2 or 3 COPD and 3) being able and willing to participate in a community-based program. |
| Weiss, 1984                                                                                                                                                                                                                      | Patients/public;<br>Clinicians                          | 80   | 66-99 | 69.5 | Chronic ill patients (cardiovascular, gastrointestinal and liver, genitourinary, nervous system, bone and joint, respiratory, arthritis and rheumatic, others) | NR                                          | NR                                                                                   | NR                    | any person 65 years of age or older who has Medicare A and B coverage only (not Medicaid coverage), resides within a certain geographic area of San Francisco, and has health or social needs that make it difficult to live or function independently.                                                      |
| Wisse, 2010                                                                                                                                                                                                                      | Patients/public                                         | 52.9 | NR    | 38   | Diabetes                                                                                                                                                       | Obesity, MI, and Cerebral vascular incident | Anti-hypertensive drug, Statin, Anticoagulants/aspirin, Exogenous insulin, Metformin | NR                    | NR                                                                                                                                                                                                                                                                                                           |
| Xian, 2010                                                                                                                                                                                                                       | Patients/public;<br>Clinicians;<br>Health-Care managers | NR   | NR    | NR   | Coronary artery disease                                                                                                                                        | NR                                          | NR                                                                                   | NR                    | they performed a data analysis using the Centers for Medicare and Medicaid Services (CMS) Hospital Compare database to compare the guideline adherence between GWTG-CAD hospitals and hospitals not participating in GWTG-CAD for 3 years and evaluated the independent effect of the GWTG-CAD program.      |
| <b>Abbreviations:</b> NR – Not reported; COPD - Chronic obstructive pulmonary disease; CHF - Congestive heart failure; HF – Heart failure; MI – Myocardial infarction; AMI – Acute myocardial infarction; T2DM – Type 2 Diabetes |                                                         |      |       |      |                                                                                                                                                                |                                             |                                                                                      |                       |                                                                                                                                                                                                                                                                                                              |
