# Supplementary material for: Sustainability of knowledge translation interventions in healthcare decision-making: a scoping review
Source: PubMed Central journal article supplement (PMC4839064; doi:10.1186/s13012-016-0421-7), 2016-04-21
Supplement: 13012_2016_421_MOESM6_ESM.pdf [file 13012_2016_421_MOESM6_ESM.pdf]

## Appendix 6. KT Interventions

| First Author, Year | Treatment                                                                         | Interventions (QI)                                                                                                                             | Level                                          | Target                           | Fidelity <sup>a</sup> | Adaptation <sup>b</sup> |
|--------------------|-----------------------------------------------------------------------------------|------------------------------------------------------------------------------------------------------------------------------------------------|------------------------------------------------|----------------------------------|-----------------------|-------------------------|
| Allen-Ramey, 2002  | Managed Care Organization Programs                                                | Clinician education, Audit and feedback, Financial incentives, Education of patients, Reminders, Case management, Promotion of self-management | Health care providers; Patients; Health system | Physician + Nurse; Patient       | No                    | Yes                     |
|                    | Reference, other Managed Care Organization Programs                               | Clinician education, Audit and feedback, Financial incentives, Education of patients, Reminders, Case management, Promotion of self-management | Health care providers; Patients; Health system | Physician + Nurse; Patient       |                       |                         |
| Ambrosio, 1983     | After intervention                                                                | Team changes, Electronic patient registry, Education of patients                                                                               | Health system ; Patients                       | Community centre; General public | No                    | No                      |
|                    | Before intervention                                                               | Usual care/Control                                                                                                                             | NR                                             | NR                               |                       |                         |
| Baillie, 2006      | Specialized chronic disease treatment program (Pre-handover)                      | Team changes, Case management, Electronic patient registry                                                                                     | Health system                                  | Patient; Community Centre        | No                    | Yes                     |
|                    | Incorporation of program activities into routine service delivery (Post-handover) | Reminders, Clinician education                                                                                                                 | Health care providers                          | Health centres                   |                       |                         |
| Baker, 2001        | Diabetes Care                                                                     | Electronic patient registry, Audit                                                                                                             | Health system; Health                          | Clinicians; Physicians           | No                    | No                      |

|                    |                                               |                                                                                                                       |                                                |                                   |    |    |
|--------------------|-----------------------------------------------|-----------------------------------------------------------------------------------------------------------------------|------------------------------------------------|-----------------------------------|----|----|
|                    | Management Support System                     | and feedback, Clinician education                                                                                     | care providers                                 |                                   |    |    |
|                    | No-Diabetes Care Management Support System    | Usual care/Control                                                                                                    | NR                                             | NR                                |    |    |
| Baker, 2011        | Health Buddy Program                          | Case management, Facilitated relay of information to clinicians, Promotion of self-management, Education of patients  | Health system; Patients                        | Patient; Care manager             | No | No |
|                    | Matched                                       | Usual care/Control                                                                                                    | NR                                             | NR                                |    |    |
| Bakitas, 2004      | Demonstration project                         | Case management, Education of patients, Team changes, Promotion of self-management                                    | Health system; Patients                        | Patient; Patient + Family         | No | No |
|                    | Control                                       | Usual care/Control                                                                                                    | NR                                             | NR                                |    |    |
| Barrera, 2001      | Mediterranean Lifestyle Program               | Promotion of self-management, Education of patients, Financial incentives, Motivational interviewing, Reminders       | Patients                                       | Patient                           | No | No |
|                    | Usual care                                    | Usual care/Control                                                                                                    | NR                                             | NR                                |    |    |
| Behnke, 2003       | Training                                      | Usual care/Control, Promotion of self-management, Reminders                                                           | Patients                                       | Patient                           | No | No |
|                    | Control                                       | Usual care/Control, Reminders                                                                                         | Patients                                       | Patient                           |    |    |
| Belardinelli, 2012 | Exercise training protocol                    | Education of patients                                                                                                 | NR                                             | Patient                           | No | No |
|                    | Control                                       | Education of patients                                                                                                 | NR                                             | Patient                           |    |    |
| Berg, 2007         | Telephonic nursing disease management program | Case management, Promotion of self-management, Reminders, Education of patients                                       | Health system; Health care providers; Patients | Patient; Physician                | No | No |
|                    | Matched                                       | Usual care/Control                                                                                                    | NR                                             |                                   |    |    |
| Bocchi, 2008       | Disease Program Management                    | Team changes, Education of patients, Case management, Promotion of self-management                                    | Health system; Patients                        | Patients                          | No | No |
|                    | Usual care                                    | Usual care/Control                                                                                                    | NR                                             | NR                                |    |    |
| Chin, 2007         | Standard intensity                            | Team changes, Continuous QI, Promotion of self-management, Audit and feedback, Electronic patient registry, Clinician | Health system; Health care providers; Patients | Community health centres; Patient | No | No |

| education, Team changes |                                                                                                                  |                                                                                                                                                      |                                                |                                                     |    |     |
|-------------------------|------------------------------------------------------------------------------------------------------------------|------------------------------------------------------------------------------------------------------------------------------------------------------|------------------------------------------------|-----------------------------------------------------|----|-----|
|                         | High intensity                                                                                                   | Team changes, Continuous QI, Promotion of self-management, Audit and feedback, Electronic patient registry, Clinician education, Team changes        | Health system; Health care providers; Patients | Community health centres; Patient                   |    |     |
| Chen, 2010              | Pay-for-Performance program Comparison                                                                           | Audit and feedback, Financial incentives Usual care/Control                                                                                          | Health care providers NR                       | Physician NR                                        | No | No  |
| Cheng, 2012             | Pay-for-Performance program Matched                                                                              | Financial incentives Usual care/Control                                                                                                              | Health care providers NR                       | Physician NR                                        | No | No  |
| Coleman, 2001           | Intervention Control                                                                                             | Promotion of self-management, Team changes, Social support, Education of patients, Case management Usual care/Control                                | Health system; Patients NR                     | Patient NR                                          | No | No  |
| Corkery, 1997           | Community health worker No- Community health worker                                                              | Education of patients, Social support, Promotion of self-management, Reminders, Case management Education of patients, Promotion of self-management, | Health system; Patients Patients               | Patient + Family; Patient Patient + Family; Patient | No | No  |
| Daniel, 1999            | Intervention Control                                                                                             | Education of patients, Promotion of self-management, Social support Usual care/Control                                                               | Patients NR                                    | Community NR                                        | No | Yes |
| Del Sindaco, 2007       | Disease management program Usual care                                                                            | Education of patients, Team changes, Case management Usual care/Control                                                                              | Health system; Patients NR                     | Patient NR                                          | No | No  |
| Dennison, 2007          | More intensive comprehensive educational-behavioral-pharmacologic intervention by a nurse practitioner/community | Team changes, Social support, Education of patients, Reminders, Case management                                                                      | Health system; Patients                        | Patient                                             | No | No  |

|                 |                                                                                           |                                                                                                   |                                      |                                  |    |     |
|-----------------|-------------------------------------------------------------------------------------------|---------------------------------------------------------------------------------------------------|--------------------------------------|----------------------------------|----|-----|
|                 | health worker/physician team                                                              |                                                                                                   |                                      |                                  |    |     |
|                 | Less intensive education + referral intervention                                          | Team changes, Social support, Education of patients, Reminders, Case management                   | Health system; Patients              | Patient                          |    |     |
| Desouza, 2010   | Group diabetes clinic                                                                     | Team changes, Education of patients, Case management                                              | Health system; Patient               | Patient                          | No | No  |
|                 | Primary care provider                                                                     | Usual care/Control                                                                                | NR                                   | NR                               |    |     |
| Erfurt, 1990    | Site 1: Control + Wellness Screening                                                      | Team changes                                                                                      | Health system                        | NR                               | No | No  |
|                 | Site 2: Wellness Screening + Health education                                             | Team changes, Education of patients                                                               | Health system; Patients              | Employee; Patient                |    |     |
|                 | Site 3: Wellness Screening + Health education + Follow-up counseling                      | Team changes, Education of patients Case management, Promotion of self-management                 | Health system; Patients              | Employee; Patient                |    |     |
|                 | Site 4: Wellness Screening + Health education + Follow-up counseling + Plant Organization | Team changes, Education of patients Case management, Promotion of self-management, Social support | Health system; Patients              | Employee; Patient                |    |     |
| Fihn, 2004      | Ambulatory Care Quality Improvement Project                                               | Audit and feedback, Clinician education                                                           | Health care providers                | Clinicians                       | No | Yes |
|                 | No-Ambulatory Care Quality Improvement Project                                            | Usual care/Control                                                                                | NR                                   | Clinicians/Intervention provider |    |     |
| Froehlich, 2002 | Late post guideline implementation                                                        | Team changes, Clinician education                                                                 | Health system; Health care providers | Clinicians                       | No | No  |
|                 | Immediate post guideline implementation                                                   | Team changes, Clinician education                                                                 | Health system; Health care providers | Clinicians                       |    |     |
|                 | Control                                                                                   | Usual care/Control                                                                                | NR                                   | NR                               |    |     |
| Gaede, 2003     | Conventional therapy                                                                      | Usual care/Control                                                                                | NR                                   | NR                               | No | No  |
|                 | Intensive therapy                                                                         | Education of patients, Promotion of self-management                                               | Patients                             | Patient                          |    |     |
| Gary, 2003      | Usual care                                                                                | Usual care/Control, Education of                                                                  | Patients                             | Patient                          | No | No  |

|                      |                                                                                        | patients                                                                                                 |                                                |                            |    |    |
|----------------------|----------------------------------------------------------------------------------------|----------------------------------------------------------------------------------------------------------|------------------------------------------------|----------------------------|----|----|
|                      | Usual care + Nurse case manager                                                        | Usual care/Control, Education of patients, Case management, Promotion of self-management                 | Health system; Patients                        | Patient                    |    |    |
|                      | Usual care + Community health worker                                                   | Usual care/Control, Education of patients, Case management, Promotion of self-management, Social support | Health system; Patients                        | Patient                    |    |    |
|                      | Usual care + Nurse case manager + Community health worker team                         | Usual care/Control, Case management, Promotion of self-management, Social support                        | Health system; Patients                        | Patient                    |    |    |
| Getpreechaswas, 2007 | Carried out by health personnel + Village health volunteers + Family health leaders    | Education of patients, Team changes, Promotion of self-management, Clinician education, Continuous QI    | Health system; Health care providers; Patients | Patients; Health personnel | No | No |
|                      | Carried out by health personnel + Village health volunteers                            | Education of patients, Team changes, Promotion of self-management, Clinician education, Continuous QI    | Health system; Health care providers; Patients | Patients; Health personnel |    |    |
|                      | Carried out by health personnel                                                        | Education of patients                                                                                    | Patients                                       | Patient                    |    |    |
| Giannuzzi, 2008      | Intervention                                                                           | Team changes, Education of patients, Promotion of self-management                                        | Health system; Patients                        | Patient                    | No | No |
|                      | Control                                                                                | Usual care/Control                                                                                       | NR                                             | NR                         |    |    |
| Gibson, 2011         | Disease Management Program                                                             | Education of patients, Case management, Promotion of self-management, Financial incentives               | Health system; Patients                        | Patient; Provider of care  | No | No |
|                      | No- Disease Management Program                                                         | Usual care/Control                                                                                       | NR                                             | NR                         |    |    |
| Grosbois, 1999       | Rehabilitation program, continued structured (supervised) exercise maintenance 2x/week | Education of patients, Promotion of self-management                                                      | Patients                                       | Patient                    | No | No |
|                      | Rehabilitation program, continued                                                      | Education of patients, Promotion of self-management                                                      | Patients                                       | Patient                    |    |    |

|                    |                                                                                  |                                                                                                            |                         |                                                         |    |    |
|--------------------|----------------------------------------------------------------------------------|------------------------------------------------------------------------------------------------------------|-------------------------|---------------------------------------------------------|----|----|
|                    | structured (supervised) exercise maintenance 1x/week                             |                                                                                                            |                         |                                                         |    |    |
|                    | Rehabilitation program, daily exercise maintenance                               | Education of patients, Promotion of self-management                                                        | Patients                | Patient                                                 |    |    |
|                    | Rehabilitation program, stopped after the program                                | Education of patients, Promotion of self-management                                                        | Patients                | Patient                                                 |    |    |
| Hedges, 2000       | Educational program                                                              | Education of patients, Social support, Clinician education, Promotion of self-management                   | Patients                | Patient + General public; Patient; Health professionals | No | No |
|                    | Control                                                                          | Usual care/Control                                                                                         | NR                      | NR                                                      |    |    |
| Hess, 2007         | Barber Intervention                                                              | Financial incentives, Education of patients, Audit and feedback, Team changes                              | Health system; Patients | Barber; Patient/customers                               | No | No |
|                    | Barber Control                                                                   | Education of patients                                                                                      | Patients                | Patient/customers                                       |    |    |
| Higginbotham, 1999 | Healthy heart support                                                            | Promotion of self-management, Education of patients                                                        | Patients                | Patient                                                 | No | No |
|                    | Control                                                                          | Usual care/Control                                                                                         | NR                      | NR                                                      |    |    |
| Hopper, 1984       | Home health aides                                                                | Education of patients, Team changes                                                                        | Health system; Patients | Patient                                                 | No | No |
|                    | Control                                                                          | Usual care/Control                                                                                         | NR                      | NR                                                      |    |    |
| Hughes, 2010       | Exercise program, negotiated maintenance with telephone reinforcement            | Education of patients, Promotion of self-management, Motivational interviewing, Case management, Reminders | Health system; Patients | Patient                                                 | No | No |
|                    | Exercise program, negotiated maintenance with no telephone reinforcement         | Education of patients, Promotion of self-management, Motivational interviewing                             | Patients                | Patient                                                 |    |    |
|                    | Exercise program, mainstreamed to facility-based exercise program with telephone | Education of patients, Promotion of self-management, Motivational interviewing, Reminders                  | Health system; Patients | Patient                                                 |    |    |

|                 |                                                                                                   |                                                                                                                                            |                         |                                |     |    |
|-----------------|---------------------------------------------------------------------------------------------------|--------------------------------------------------------------------------------------------------------------------------------------------|-------------------------|--------------------------------|-----|----|
|                 | reinforcement                                                                                     |                                                                                                                                            |                         |                                |     |    |
|                 | Exercise program, mainstreamed to facility-based exercise program with no telephone reinforcement | Education of patients, Motivational interviewing                                                                                           | Patients                | Patient                        |     |    |
| Huizinga, 2010  | Routine follow-up                                                                                 | Usual care/Control                                                                                                                         | NR                      | NR                             | Yes | No |
|                 | Routine follow-up + quarterly telephone contact                                                   | Team changes, Promotion of self-management, Case management, Motivational interviewing                                                     | Health system; Patients | Patient                        |     |    |
|                 | Routine follow-up + monthly telephone contact                                                     | Team changes, Promotion of self-management, Case management, Motivational interviewing                                                     | Health system; Patients | Patient                        |     |    |
| Inglis, 2006    | Home based intervention                                                                           | Team changes, Case management, Education of patients, Promotion of self-management                                                         | Health system; Patients | Patient                        | No  | No |
|                 | Usual care                                                                                        | Usual care/Control, Team changes                                                                                                           | Health system; Patients | Patient                        |     |    |
| Jia, 2009       | Care Coordination Home Telehealth program                                                         | Case management, Facilitated relay of information to clinicians, Team changes, Reminders                                                   | Health system; Patients | Patient                        | No  | No |
|                 | Control                                                                                           | Usual care/Control                                                                                                                         | NR                      | NR                             |     |    |
| Jovanovic, 2004 | Diabetes case management                                                                          | Case management, Education of patients, Promotion of self-management, Facilitated relay of information to clinicians, Financial incentives | Health system; Patients | Patient; Primary care provider | No  | No |
|                 | Traditional primary care treatment                                                                | Usual care/Control                                                                                                                         | NR                      |                                |     |    |
| Kelso, 1996     | Educational Interventions                                                                         | Education of patients, Promotion of self-management                                                                                        | Patients                | Patient                        | No  | No |
|                 | Control                                                                                           | Usual care/Control                                                                                                                         | NR                      | NR                             |     |    |

|                 |                                                                                              |                                                                                                                                                             |                                                |                                         |    |    |
|-----------------|----------------------------------------------------------------------------------------------|-------------------------------------------------------------------------------------------------------------------------------------------------------------|------------------------------------------------|-----------------------------------------|----|----|
| Kim, 2011a      | Participants assigned to the in-class to receive High blood pressure-related education       | Education of patients, Promotion of self-management                                                                                                         | Patients                                       | Patient                                 | No | No |
|                 | Participants assigned to the mail education to receive High blood pressure-related education | Education of patients                                                                                                                                       | Patients                                       | Patient                                 |    |    |
| Kim, 2011b      | Less-intensive telephone counseling                                                          | Facilitated relay of information to clinicians, Case management, Promotion of self-management                                                               | Health system; Patients                        | Patient + Nurse; Patient                | NR | NR |
|                 | More-intensive counseling                                                                    | Facilitated relay of information to clinicians, Case management, Promotion of self-management                                                               | Health system; Patients                        | Patient + Nurse; Patient                |    |    |
| Krishan, 1979   | Wabasha                                                                                      | Team changes, Case management, Clinician education, Education of patients, Social support, Promotion of self-management                                     | Health system; Health care providers; Patients | Patient; Physician + Nurse              | No | No |
|                 | Owatoma                                                                                      | Education of patients, Social support                                                                                                                       | Health system; Health care providers; Patients | Patient; Physician + Nurse              |    |    |
|                 | Spring valley                                                                                | Education of patients, Social support                                                                                                                       | Patients                                       | Patient                                 |    |    |
| Chavannes, 2009 | Picasso Bocholtz intervention                                                                | Team changes, Case management, Promotion of self-management, Education of patients                                                                          | Health system; Patients                        | Patient                                 | No | No |
|                 | Usual care                                                                                   | Usual care/Control                                                                                                                                          | NR                                             | NR                                      |    |    |
| Lawrence, 2008  | Longitudinal adherence treatment evaluation program                                          | Case management, Electronic patient registry, Reminders, Motivational interviewing, Clinician education, Financial incentives, Promotion of self-management | Health system; Health care providers; Patients | Patient; Care manager; Community centre | No | No |
|                 | Control                                                                                      | Usual care/Control                                                                                                                                          | NR                                             | NR                                      |    |    |



|                   |                                                            |                                                                                                                                       |                                                |                               |    |    |
|-------------------|------------------------------------------------------------|---------------------------------------------------------------------------------------------------------------------------------------|------------------------------------------------|-------------------------------|----|----|
| Montero, 2005     | Cardiac rehabilitation program                             | Education of patients, Team changes, Promotion of self-management, Case management                                                    | Health system; Patients                        | Patient + Family; Patient     | No | No |
|                   | Control                                                    | Usual care/Control                                                                                                                    | NR                                             | NR                            |    |    |
| Mildestvedt, 2008 | Intervention                                               | Education of patients, Promotion of self-management, Team changes                                                                     | Health system; Patients                        | Patient                       | No | No |
|                   | Standard rehabilitation                                    | Usual care/Control                                                                                                                    | NR                                             | NR                            |    |    |
| Morisky, 1983     | Educational Program Content (E1C2C3)                       | Motivational interviewing, Education of patients, Promotion of self-management, Usual care/Control                                    | Patients                                       | Patient                       | No | No |
|                   | Educational Program Content (C1E2C3)                       | Usual care/Control, Social support                                                                                                    | Patients                                       | Patient                       |    |    |
|                   | Educational Program Content (C1C2E3)                       | Usual care/Control, Education of patients, Promotion of self-management                                                               | Patients                                       | Patient                       |    |    |
|                   | Educational Program Content (E1E2C3)                       | Motivational interviewing, Education of patients, Promotion of self-management, Usual care/Control, Social support                    | Patients                                       | Patient                       |    |    |
|                   | Educational Program Content (E1C2E3)                       | Motivational interviewing, Education of patients, Promotion of self-management, Usual care/Control                                    | Patients                                       | Patient                       |    |    |
|                   | Educational Program Content (C1E2E3)                       | Education of patients, Promotion of self-management, Usual care/Control, Social support                                               | Patients                                       | Patient                       |    |    |
|                   | Educational Program Content (E1E2E3)                       | Motivational interviewing, Education of patients, Promotion of self-management, Social support                                        | Patients                                       | Patient                       |    |    |
|                   | Control (C1C2C3)                                           | Usual care/Control                                                                                                                    | NR                                             | NR                            |    |    |
| Olson, 2009       | Continue to receive Clinical Pharmacy Cardiac Risk Service | Team changes, Promotion of self-management, Case management, Education of patients, Electronic patient registry, Reminders, Clinician | Health system; Health care providers; Patients | Patient; Health care provider | No | No |

| education      |                                                                |                                                    |                         |                                                                                                                                          |    |    |
|----------------|----------------------------------------------------------------|----------------------------------------------------|-------------------------|------------------------------------------------------------------------------------------------------------------------------------------|----|----|
|                | Usual care                                                     | Usual care/Control, Reminders                      | Patients                | Patient                                                                                                                                  |    |    |
| Perk, 1989     | Continued long-term cardiac rehabilitation program             | Education of patients, Team changes                | Health system; Patients | Patient                                                                                                                                  | No | No |
|                | Control                                                        | Usual care/Control                                 | NR                      | NR                                                                                                                                       |    |    |
| Phillips, 2005 | Copy computerized reminders                                    | Clinician education, Reminders                     | Health care providers   | Residents; Nurse Practitioners; Physician Assistants; Attending Physicians; Pharmacists; Nutritionists; Health Educators; Social Workers | No | No |
|                | Individual face-to-face feedback                               | Clinician education, Audit and feedback            | Health care providers   | Residents; Nurse Practitioners; Physician Assistants; Attending Physicians; Pharmacists; Nutritionists; Health Educators; Social Workers |    |    |
|                | Copy computerized reminders + Individual face-to-face feedback | Clinician education, Reminders, Audit and feedback | Health care providers   | Residents; Nurse Practitioners; Physician Assistants; Attending Physicians; Pharmacists; Nutritionists; Health Educators; Social Workers |    |    |
|                | Control                                                        | Clinician education, Usual care/Control            | Health care providers   | Residents; Nurse Practitioners; Physician Assistants; Attending Physicians; Pharmacists;                                                 |    |    |

|                  |                                                             |                                                                                                                        |                                                |                                                 |     |     |
|------------------|-------------------------------------------------------------|------------------------------------------------------------------------------------------------------------------------|------------------------------------------------|-------------------------------------------------|-----|-----|
|                  |                                                             |                                                                                                                        |                                                | Nutritionists; Health Educators; Social Workers |     |     |
| Pill, 1998       | Intervention                                                | Education of patients, Promotion of self-management, Clinician education                                               | Health care providers; Patients                | Patient; General Practitioner + Nurse           | No  | No  |
|                  | Usual care                                                  | Education of patients                                                                                                  | Patients                                       | Patient                                         |     |     |
| Radziewicz, 2009 | Coping and communication support intervention               | Case management, Promotion of self-management                                                                          | Health system; Patients                        | Patient                                         | Yes | No  |
|                  | Usual care                                                  | Usual care/Control                                                                                                     | NR                                             | NR                                              |     |     |
| Reichard, 1996   | Intensified conventional treatment                          | Education of patients, Promotion of self-management, Case management                                                   | Health system; Patients                        | Patient                                         | No  | Yes |
|                  | Standard treatment                                          | Education of patients, Promotion of self-management                                                                    | Patients                                       | Patient                                         |     |     |
| Rothschild, 2012 | Receive diabetes counselling from a Promotora               | Promotion of self-management, Team changes, Education of patients, Motivational interviewing                           | Health system; Patients                        | Patient                                         | No  | No  |
|                  | Receive diabetes education through mailings                 | Education of patients                                                                                                  | Patients                                       | Patient                                         |     |     |
| Rowley, 2000     | Intervention among high-risk overweight and diabetic people | Education of patients, Promotion of self-management                                                                    | Patients                                       | Patient + Family                                | No  | No  |
|                  | Intervention in the wider community                         | Education of patients, Promotion of self-management, Social support                                                    | Patients                                       | Patient + Family                                |     |     |
| Skinner, 2000    | Learn, Share & Live education program                       | Education of patients                                                                                                  | Patients                                       | Patient                                         | No  | No  |
|                  | Control                                                     | Usual care/Control                                                                                                     | NR                                             | NR                                              |     |     |
| Stroebel, 2000   | Intervention                                                | Clinician education, Team changes, Education of patients, Continuous QI, Case management, Promotion of self-management | Health system; Health care providers; Patients | Physician; Patient                              | No  | No  |

|                    |                                                                              |                                                                                                                         |                                                |                                               |    |    |
|--------------------|------------------------------------------------------------------------------|-------------------------------------------------------------------------------------------------------------------------|------------------------------------------------|-----------------------------------------------|----|----|
|                    | Usual care                                                                   | Clinician education                                                                                                     | Health care providers                          | Physician; Patient                            |    |    |
| Svetkey, 2009      | Physician intervention                                                       | Clinician education, Audit and feedback                                                                                 | Health care providers                          | Physician                                     | No | No |
|                    | Patient intervention                                                         | Education of patients, Promotion of self-management, Motivational interviewing                                          | Patients                                       | Patient                                       |    |    |
|                    | Physician + patient interventions combined                                   | Clinician education, Audit and feedback, Education of patients, Promotion of self-management, Motivational interviewing | Health care providers; Patients                | Physician; Patient                            |    |    |
|                    | Usual care                                                                   | Education of patients                                                                                                   | Patients                                       | Patient                                       |    |    |
| Tamone, 2012       | Intervention                                                                 | Education of patients, Promotion of self-management, Case management, Reminders                                         | Health system; Patients                        | Patient                                       | No | No |
|                    | Historical cohort                                                            | Usual care/Control                                                                                                      | NR                                             | NR                                            |    |    |
| van Wetering, 2009 | INTERdisciplinary COMMunity based COPD management program (INTERCOM) program | Team changes, Education of patients, Promotion of self-management                                                       | Health system; Patients                        | Patient                                       | No | No |
|                    | Usual care                                                                   | Education of patients                                                                                                   | Patients                                       | Patient                                       |    |    |
| Weiss, 1984        | Intervention                                                                 | Team changes, Promotion of self-management, Case management, Financial incentives                                       | Health system; Patients                        | Patient                                       | No | No |
|                    | Control                                                                      | Usual care/Control                                                                                                      | NR                                             | NR                                            |    |    |
| Wisse, 2010        | Intervention                                                                 | Promotion of self-management                                                                                            | Patients                                       | Patient                                       | No | No |
|                    | Usual care                                                                   | Usual care/Control                                                                                                      | NR                                             | NR                                            |    |    |
| Xian, 2010         | Get With the Guidelines-Coronary Artery Disease program                      | Financial incentives, Audit and feedback, Promotion of self-management, Team changes, Clinician education, Reminders,   | Health system; Health care providers; Patients | Hospitals teams; Healthcare provider; Patient | No | No |

---

Electronic patient registry,  
Education of patients

---

|                                                                               |                    |    |    |
|-------------------------------------------------------------------------------|--------------------|----|----|
| Without the Get With<br>the Guidelines-<br>Coronary Artery<br>Disease program | Usual care/Control | NR | NR |
|-------------------------------------------------------------------------------|--------------------|----|----|

---

**Abbreviations:** NR – Not reported

a – “the consistency and quality of targeted organizational members' use of the specific innovation”. [Source: Klein KJ, Sorra JS. The challenge of innovation implementation. *Acad Manag Rev.* 1996;21:1055–1080. doi: 10.2307/259164].

b – KT intervention adapted or changed over time

---
