# Supplementary material for: Sustainability of knowledge translation interventions in healthcare decision-making: a scoping review
Source: PubMed Central journal article supplement (PMC4839064; doi:10.1186/s13012-016-0421-7), 2016-04-21
Supplement: 13012_2016_421_MOESM8_ESM.pdf [file 13012_2016_421_MOESM8_ESM.pdf]

## Appendix 8. Outcomes

| <b>First Author, Year</b> | <b>Outcome Themes [Combined]</b>                                                                                                                      | <b>Outcome Levels [Combined]</b>   |
|---------------------------|-------------------------------------------------------------------------------------------------------------------------------------------------------|------------------------------------|
| Allen-Ramey, 2002         | Disease severity, Pulmonary function, Knowledge, Health care utilization, Compliance, Employment                                                      | Patient level, Systems level       |
| Ambrosio, 1983            | Health care utilization, Blood pressure                                                                                                               | Patient level                      |
| Bailie, 2006              | Blood pressure, Disease severity                                                                                                                      | Both, Patient level                |
| Baker, 2001               | Health care utilization                                                                                                                               | Systems level, Patient level       |
| Baker, 2011               | Cost, Overall mortality and cause-specific mortality                                                                                                  | Systems level, Patient level       |
| Bakitas, 2004             | Compliance, Satisfaction, Level of care                                                                                                               | Patient level, Systems level       |
| Barrera, 2011             | Compliance, Cognition, Self-efficacy, Attitude, Diet, Function, Mental health, BMI + Glycemic control, BMI                                            | Patient level                      |
| Behnke, 2003              | Health care utilization, Quality of Life, Function, Pulmonary function                                                                                | Systems level, Patient level       |
| Belardinelli, 2012        | Compliance, Function, Pulmonary function, CV health, Quality of Life, Safety, Health care utilization, Overall mortality and cause-specific mortality | Patient level                      |
| Berg, 2007                | Health care utilization, Glycemic control                                                                                                             | Systems level, Patient level       |
| Bocchi, 2008              | Compliance, Health care utilization, Diet, Quality, Feasibility, Overall mortality and cause-specific mortality, Health care utilization              | Patient level, Systems level       |
| Chen, 2010                | Health care utilization, Glycemic control, Quality of Life                                                                                            | Systems level                      |
| Cheng, 2012               | Health care utilization, Cost                                                                                                                         | Patient level, Systems level       |
| Chin, 2007                | Glycemic control, Cholesterol, Renal function, Health care utilization, Blood pressure                                                                | Systems level, Patient level       |
| Coleman, 2001             | Health status, Function, Health care utilization, Compliance, Cost, Satisfaction                                                                      | Patient level, Systems level       |
| Corkery, 1997             | Compliance, Behaviour, Glycemic control                                                                                                               | Patient level                      |
| Daniel, 1999              | Glycemic control, BMI, Blood pressure, Function, Knowledge, Function, Cholesterol, Weight                                                             | Patient level                      |
| Del Sindaco, 2007         | Health care utilization, CV health, Health care utilization, Overall mortality and cause-specific mortality, Health status, Quality of Life, Cost     | Systems level, Both, Patient level |
| Dennison, 2007            | Overall mortality and cause-specific mortality, Blood pressure, CV health, Renal function, Cholesterol, Disease severity, BMI, Health                 | Systems level, Patient level       |

|                      |                                                                                                                                                                                                                                 |                                     |
|----------------------|---------------------------------------------------------------------------------------------------------------------------------------------------------------------------------------------------------------------------------|-------------------------------------|
|                      | care utilization, Compliance, Blood pressure, Attitude, Barrier/facilitator, Behaviour                                                                                                                                          |                                     |
| Desouza, 2010        | Glycemic control, Cholesterol, Blood pressure                                                                                                                                                                                   | Patient level                       |
| Erfurt, 1990         | Compliance, Blood pressure , Health care utilization                                                                                                                                                                            | Patient level, Systems level        |
| Fihn, 2004           | Health care utilization, Function, Mental health, Satisfaction, Blood pressure, Alcohol                                                                                                                                         | Systems level, Both, Patient level  |
| Froehlich, 2002      | Health care utilization, Cost, Overall mortality and cause-specific mortality, CV health , CV health + Overall mortality and cause-specific mortality                                                                           | Systems level                       |
| Gaede, 2003          | BMI, Blood pressure, Smoking, Diet, Alcohol, BMI, Function, Glycemic control, Cholesterol, Renal function, CV health, Blood pressure + cholesterol + Glycemic control , Vision health, Nerve function, Glycemic control, Vision | Patient level, Systems level        |
| Gary, 2003           | Glycemic control, Cholesterol, Blood pressure, Diet, Function, BMI, Motivation                                                                                                                                                  | Patient level                       |
| Getpreechaswas, 2007 | Knowledge, Attitude, Diet, Function, Mental health, Smoking, Alcohol, BMI, Satisfaction, Cost                                                                                                                                   | Patient level, Systems level        |
| Giannuzzi, 2008      | Overall mortality and cause-specific mortality, CV health, Health care utilization, CV health + Overall mortality and cause-specific mortality, Function, Mental health, Diet, Cholesterol, Glycemic control, BMI, Smoking      | Systems level, Patient level        |
| Gibson, 2011         | Utilization, Cost, Compliance                                                                                                                                                                                                   | Patient level                       |
| Grosbois, 1999       | Pulmonary function, Function                                                                                                                                                                                                    | Patient level                       |
| Hedges, 2000         | CV health, Overall mortality and cause-specific mortality, Health care utilization, Blood pressure                                                                                                                              | Systems level, Patients level, Both |
| Hess, 2007           | Blood pressure                                                                                                                                                                                                                  | Patient level                       |
| Higginbotham, 1999   | CV health, Overall mortality and cause-specific mortality, Health care utilization, Smoking, BMI, Blood pressure, Cholesterol, Compliance                                                                                       | Systems level, Both                 |
| Hopper, 1984         | Glycemic control, Health care utilization, BMI                                                                                                                                                                                  | Patient level, both                 |
| Hughes, 2010         | Compliance, Diet, Pain, Function, BMI, Mental health, Self-efficacy                                                                                                                                                             | Patient level                       |
| Huizinga, 2010       | Glycemic control, BMI, Health care utilization, Satisfaction, Attitude                                                                                                                                                          | Patient level, System level         |
| Inglis, 2006         | Overall mortality and cause-specific mortality, Health care utilization, Cost                                                                                                                                                   | Patient level, Both, Systems level  |
| Jia, 2009            | Comorbidity, Health care utilization, Overall mortality and cause-specific mortality                                                                                                                                            | Patient level, Systems level        |

|                   |                                                                                                                                                                                                                   |                                    |
|-------------------|-------------------------------------------------------------------------------------------------------------------------------------------------------------------------------------------------------------------|------------------------------------|
| Jovanovic, 2004   | Glycemic control, Health care utilization, BMI, Blood pressure, Cholesterol                                                                                                                                       | Patient level, Systems level, Both |
| Kelso, 1996       | Health care utilization, Knowledge, Pulmonary function, Quality of Life, Safety                                                                                                                                   | Patient level                      |
| Kim, 2011         | Blood pressure, Mental health, Self-efficacy, Knowledge, Compliance                                                                                                                                               | Patient level                      |
| Krishan, 1979     | Blood pressure                                                                                                                                                                                                    | Systems level                      |
| Chavannes, 2009   | Pulmonary function, Quality of Life                                                                                                                                                                               | Patient level                      |
| Lawrence, 2008    | Compliance, Health care utilization                                                                                                                                                                               | Systems level                      |
| Montero, 2005     | Overall mortality and cause-specific mortality, Safety                                                                                                                                                            | Systems level                      |
| Mildestvedt, 2008 | Function, Attitude, Motivation                                                                                                                                                                                    | Patient level                      |
| Morisky, 1983     | BMI, Compliance, Blood pressure, Overall mortality and cause-specific mortality                                                                                                                                   | Patient level                      |
| Olson, 2009       | Cholesterol, Overall mortality and cause-specific mortality, Health care utilization, Compliance, Blood pressure                                                                                                  | Systems level, Patient level, Both |
| Perk, 1989        | Compliance, Safety, Employment, Blood pressure, CV health, Mental health, Health care utilization, Function, Attitude, Behaviour, Liver function, Overall mortality and cause-specific mortality, Motivation      | Both, Patient level                |
| Phillips, 2005    | Glycemic control, Blood pressure, Cholesterol, Behaviour, Blood pressure + Cholesterol + Glycemic control                                                                                                         | Patient level, Systems level       |
| Pill, 1998        | Glycemic control, BMI, Blood pressure, Compliance, Safety, Satisfaction, Health status, Health care utilization                                                                                                   | Patient level                      |
| Radziewicz, 2009  | Fidelity, Compliance, Health care utilization, Satisfaction                                                                                                                                                       | Systems level, Both                |
| Reichard, 1996    | Glycemic control, Vision health, Renal function, Blood pressure, Health care utilization, Nerve function, Cognition, BMI, Health status, Overall mortality and cause-specific mortality, Disease severity, Vision | Patient level, Systems level, Both |
| Rothschild, 2012  | Glycemic control, Blood pressure, BMI, Health care utilization, Behaviour, Compliance                                                                                                                             | Patient level, Systems level       |
| Rowley, 2000      | BMI, Glycemic control, Diet + Function, BMI + Glycemic control + Cholesterol                                                                                                                                      | Patient level, Both                |
| Skinner, 2000     | Compliance, Knowledge, Satisfaction, Barrier/facilitator                                                                                                                                                          | Patient level                      |
| Stroebel, 2000    | Blood pressure, Health care utilization                                                                                                                                                                           | Patient level                      |

|                    |                                                                                                                                                                             |                                    |
|--------------------|-----------------------------------------------------------------------------------------------------------------------------------------------------------------------------|------------------------------------|
| Svetkey, 2009      | Blood pressure, BMI, Diet, Function, Glycemic control, Cholesterol                                                                                                          | Patient level                      |
| Tamone, 2012       | Compliance, Discontinuation                                                                                                                                                 | Both, Systems level, Patient level |
| van Wetering, 2009 | Quality of Life, Pulmonary function, Function, BMI, Attitude                                                                                                                | Patient level                      |
| Weiss, 1984        | Health status, Function, Mental health, Satisfaction, Overall mortality and cause-specific mortality, Health care utilization, Level of care, Cost, Health care utilization | Patient level, Systems level, Both |
| Wisse, 2010        | Health status, Function, Blood pressure, BMI, Glycemic control, Renal function, Cholesterol                                                                                 | Patient level                      |
| Xian, 2010         | Health care utilization                                                                                                                                                     | Systems level                      |
